RESEARCH ARTICLE

# Identification and Comparison of Candidate Olfactory Genes in the Olfactory and Non-Olfactory Organs of Elm Pest *Ambrostoma quadriimpresum* (Coleoptera: Chrysomelidae) Based on Transcriptome Analysis

Yinliang Wang<sup>1,2</sup>, Qi Chen<sup>1,2</sup>, Hanbo Zhao<sup>1,2</sup>, Bingzhong Ren<sup>1,2\*</sup>

**1** Jilin Provincial Key Laboratory of Animal Resource Conservation and Utilization, Northeast Normal University, Changchun, China, **2** Key Laboratory of Vegetation Ecology, MOE, Northeast Normal University, Changchun, China

\* [bzren@163.com](mailto:bzren@163.com)

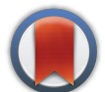

CrossMark  
click for updates

OPEN ACCESS

**Citation:** Wang Y, Chen Q, Zhao H, Ren B (2016) Identification and Comparison of Candidate Olfactory Genes in the Olfactory and Non-Olfactory Organs of Elm Pest *Ambrostoma quadriimpresum* (Coleoptera: Chrysomelidae) Based on Transcriptome Analysis. PLoS ONE 11(1): e0147144. doi:10.1371/journal.pone.0147144

**Editor:** J Joe Hull, USDA-ARS, UNITED STATES

**Received:** August 28, 2015

**Accepted:** December 29, 2015

**Published:** January 22, 2016

**Copyright:** © 2016 Wang et al. This is an open access article distributed under the terms of the [Creative Commons Attribution License](https://creativecommons.org/licenses/by/4.0/), which permits unrestricted use, distribution, and reproduction in any medium, provided the original author and source are credited.

**Data Availability Statement:** All SRA files are available from the NCBI database (accession numbers SRS876374 and SRS876375).

**Funding:** This work was funded by Natural Science Foundation of China (No. 31172133, BZR; 31501890, YLW), Natural Science Foundation of Jilin province (No. 2412015KJ017, BZR; 20150520072JH, YLW), Fundamental Research Funds for the Central Universities (No. 2412015KJ017, YLW), and China Postdoctoral Science Foundation (No. 2015M581385, YLW).

## Abstract

The leaf beetle *Ambrostoma quadriimpresum* (Coleoptera: Chrysomelidae) is a predominant forest pest that causes substantial damage to the lumber industry and city management. However, no effective and environmentally friendly chemical method has been discovered to control this pest. Until recently, the molecular basis of the olfactory system in *A. quadriimpresum* was completely unknown. In this study, antennae and leg transcriptomes were analyzed and compared using deep sequencing data to identify the olfactory genes in *A. quadriimpresum*. Moreover, the expression profiles of both male and female candidate olfactory genes were analyzed and validated by bioinformatics, motif analysis, homology analysis, semi-quantitative RT-PCR and RT-qPCR experiments in antennal and non-olfactory organs to explore the candidate olfactory genes that might play key roles in the life cycle of *A. quadriimpresum*. As a result, approximately 102.9 million and 97.3 million clean reads were obtained from the libraries created from the antennae and legs, respectively. Annotation led to 34344 Unigenes, which were matched to known proteins. Annotation data revealed that the number of genes in antenna with binding functions and receptor activity was greater than that of legs. Furthermore, many pathway genes were differentially expressed in the two organs. Sixteen candidate odorant binding proteins (OBPs), 10 chemosensory proteins (CSPs), 34 odorant receptors (ORs), 20 inotropic receptors [1] and 2 sensory neuron membrane proteins (SNMPs) and their isoforms were identified. Additionally, 15 OBPs, 9 CSPs, 18 ORs, 6 IRs and 2 SNMPs were predicted to be complete ORFs. Using RT-PCR, RT-qPCR and homology analysis, AquaOBP1/2/4/7/C1/C6, AquaCSP3/9, AquaOR8/9/10/14/15/18/20/26/29/33, AquaIR8a/13/25a showed olfactory-specific expression, indicating that these genes might play a key role in olfaction-related behaviors in *A. quadriimpresum* such as foraging and seeking. AquaOBP4/C5,

**Competing Interests:** The authors have declared that no competing interests exist.

AquaOBP4/C5, AquaCSP7/9/10, AquaOR17/24/32 and AqualR4 were highly expressed in the antenna of males, suggesting that these genes were related to sex-specific behaviors, and expression trends that were male specific were observed for most candidate olfactory genes, which supported the existence of a female-produced sex pheromone in *A. quadriimpressum*. All of these results could provide valuable information and guidance for future functional studies on these genes and provide better molecular knowledge regarding the olfactory system in *A. quadriimpressum*.

## Introduction

Insects evolved a highly sensitive and acute peripheral system that can selectively detect environmental molecules. These molecules contain information that regulates a series of important insect behaviors, such as mating [2], foraging [3], oviposition [4], and host-seeking [5]. Several types of olfactory proteins play key roles in determining or helping to complete the selective detection process for the odorants, including odorant-binding proteins, odorant receptors, ionotropic receptors and sensory neuron membrane proteins and odorant-degrading enzymes [6]. Through the great efforts of many scholars during the past decade, a convincing model for the peripheral detection of odorants in insects was established, the function, structure and mechanism of many OBPs and ORs have been studied through biochemical, molecular biological and electrophysiological experiments [4, 7–9]. Recently, the identification of a new family of IRs, which are likewise stimulated by odorants but expressed in different olfactory neurons, have provided new insights into the molecular mechanisms of odorant reception in insects [1].

Although the knowledge of the molecular olfactory system has grown rapidly since the first insect ORs were identified [10], our current knowledge of the olfactory system in insects is still highly reliant on a few insects, such as *D. melanogaster* and *Anopheles gambiae*. Additionally, many phenomena cannot be explained because of insect diversity; for example, the behaviors and habitats between Dipteran species and other insects may exhibit differences not only in the type of odorants used but also in the reception process of these semiochemicals. Therefore, the current knowledge of insect olfactory genes remains limited. To the best of our knowledge, olfactory genes have been systematically analyzed in a limited number of coleopteran species, including *Tribolium castaneum*, *Dendroctonus ponderosae*, *Ips typographus* (genome sequences are available), *Monochamus alternatus*, *Dastarcus helophoroides*, *Rhizopertha dominica*, *Leptinotarsa decemlineata*, *Tenebrio molitor*, *Megacyllene caryae*, *Anomala corpulenta* and *Dendroctonus valens* (based on RNA sequencing data) [11–20]. With the rapid growth of sequencing and bioinformatics, there has been a marked increase in the number of insect olfactory genes identified based on genome or transcriptome analysis. Despite these advances, our molecular understanding of olfaction for a large number of coleopteran species that have substantial influences on agriculture, forestry and human health remains completely unknown.

The beetle *Ambrostoma quadriimpressum* (Coleoptera: Chrysomelidae) is a major forest pest. It is a monophagous species found in the East Asian region, especially in Northeast China, where it feeds exclusively on the shoots and leaves of elms, such as *Ulmus pumila*, *Ulmus macrocarpa* and *Ulmus japonica*. This forest pest lives on the elm for nearly 6 months every year from April to October. After October, they crawl into the soil for winter, but they emerge back onto the elm for oviposition in April of the next year. Both larval and adult *A. quadriimpressum* feed on elm leaves. When an outbreak occurs, nearly all of the elm leaves are eaten, resulting in an irregular death before the elm is fully grown. These pests seriously

damage wooded forests and city green belts and have caused billions of dollars in property loss in the lumber industry and city management [21].

Previous behavioral research has demonstrated that male *A. quadriimpressum* are attracted by a hexane extract from the female elytra and attempt to mate with artificial females bathed in this extract, highly supporting the existence of a female-produced contact sex pheromone in *A. quadriimpressum* [22]. Furthermore, GC-MS analysis indicated that the extracts contained mainly straight-chain hydrocarbon compounds with mono-, di-, and trimethyl branches, with four compounds that were unique to females and eight hydrocarbons present at significantly higher levels than in males, suggesting a candidate contact sex pheromone role for these chemicals [22]. Moreover, because a series of elm volatiles and herbivore induced plant volatiles (HIPVs) might elicit significant EAG and attract/repel responses in *A. quadriimpressum* [23], these results indicated that olfaction might play crucial roles in mating, foraging, and host-seeking behaviors in *A. quadriimpressum*; however, the molecular basis for the olfactory system in *A. quadriimpressum* remains completely unknown.

In the past, the prevention and control methods of this pest consisted of using highly toxic chemicals, such as phosphamidon, carbofuran and omethoate [24]. These chemicals not only seriously pollute the environment but are also have hazardous off-target effects in humans, bees and cattle. A broader understanding of olfaction in *A. quadriimpressum* is the first step in identifying an effective and safe control method for this pest. Thus, systematic identification of odorant genes in *A. quadriimpressum* is urgently needed to facilitate future functional studies on odorant genes and will help elucidate the mechanism of olfactory-related behaviors in *A. quadriimpressum*, allowing the exploration of new chemical control methods.

In this study, antennae and leg transcriptomes were analyzed and compared based on deep sequencing data to identify the existence and sequences of OBPs, CSPs, ORs, IRs and SNMP genes in *A. quadriimpressum* for future functional studies. Moreover, the expression profiles of both male and female candidate olfactory genes were analyzed and validated by bioinformatics, semi-quantitative RT-PCR and RT-qPCR experiments to explore the candidate olfactory genes that may play a key role in the life cycle of *A. quadriimpressum*.

## Material and Methods

### Insects

Newly emerged adult beetles (*A. quadriimpressum*) were collected from elm (*Ulmus pumila*) trees in June in Jilin province (E125.3 N43.9, E124.2 N 44.5), China, and maintained in an artificial climate box (Boxun, Shanghai, China) kept at 28°C and 85% humidity, where they were fed fresh elm leaves under a 12:12-h light–dark cycle. The total number of adults was more than three hundred, and the male/female ratio was approximately 1:1. The sample collection was authorized by the forestry bureau of Jilin province.

### RNA Extraction, cDNA Synthesis and Sequencing

Antennae, hindlegs, underwing and thorax muscles were carefully separated from the insect (to avoid age differences, total RNA was extracted from the adults, which were collected at the same location and date) by DEPC-treated forceps under a stereomicroscope (Motic, Hong Kong, China). These appendages were collected from 60 mixed samples (male/female ratio 1:1 for RNA sequencing) including 30 females and 30 males. Thirty paired samples of hindleg RNA (for semi-quantitative RT-PCR and RT-qPCR) was also collected from from thirty paired hindlegs as a non-olfactory tissue control, and the collected tissue was stored on ice with DEPC-treated 1:1 water/ethanol solutions before being used. Total RNA was isolated from homogenized antennas in Trizol reagent (Invitrogen, Carlsbad, CA, USA) following the

manufacturer's protocols, followed by an ethanol/isopropanol precipitation with a final solution of 30  $\mu$ l RNase-free water. After extraction, the total RNA sample was assessed with a Nano-Drop 2000 (Thermo Fisher Scientific, Waltham, MA, USA) and in a 1% agarose gel. UV absorption values at 230 nm/260 nm and 260 nm/280 nm were recorded to monitor the purity of the RNA products, and the mRNA smear above the 28S rRNA band was also checked to verify RNA integrity. For semi-quantitative RT-PCR and RT-qPCR experiments, cDNA samples were quantified by total RNA before RT, with a final concentration of 176 ng/ $\mu$ l (according to the lowest concentration of all the samples; other samples were all diluted to this concentration for cDNA quantification) in all of the mixed, male, and female antenna and leg samples. Then, the same amount of total RNA from each sample was transcribed into cDNA in a reaction (total volume of 20  $\mu$ l) containing 3  $\mu$ l (528 ng) total RNA solution, 4  $\mu$ l first-strand buffer (250 mM Tris pH 8.3, 375 mM KCl, and 15 mM MgCl<sub>2</sub>), 1  $\mu$ l 10-mM dNTP mix, 1  $\mu$ l RNaseout, 1  $\mu$ l DTT (0.1 M), 1  $\mu$ l oligo-(dT)20 primer (50  $\mu$ M) and 1  $\mu$ l Superscript III reverse transcriptase (200 units/ $\mu$ l) (Invitrogen, Carlsbad, CA, USA). The cDNA synthesis was performed for 45 min at 50°C, followed by 15 min at 70°C. Finally, quantified sex- and organ-specific samples were diluted 1:50 prior to use as PCR templates for quantitative analysis. For RNA sequencing, total RNA samples from the antenna and legs were evaluated on an Agilent 210 Bioanalyzer (Agilent Technologies, Santa Clara, CA, USA). High-quality RNA was sent to Biomarker Technologies Corporation (Beijing, China) for cDNA library construction and sequencing. mRNA was purified using the interaction of the poly (A) tails and magnetic oligo (dT) beads. RNA sequencing libraries were generated using the NEBNext<sup>®</sup> Ultra RNA Library Prep Kit for Illumina sequencing (New England Biolabs, Ipswich, MA, USA) with multiplex primers according to the manufacturer's protocol. The cDNA library was constructed with average inserts of 200 bp (150–250 bp) using a non-stranded library preparation. The antenna and leg cDNA samples were bar-coded (antenna: CTTGTA; legs: AGTCAA) and purified using AMPure XP Beads (Beckman Coulter, Inc.). The short cDNA fragments were cloned using end-repair adapter ligation. Then, suitable fragments were selected with Agencourt AMPure XP beads (Beckman Coulter, Inc.) and enriched by PCR amplification. Sequencing was performed via a paired-end 125-cycle rapid run on an Illumina HiSeq2000.

## Assembly and Functional Annotation

High-quality clean reads were obtained by removing the adaptor sequences, duplicated sequences, ambiguous reads ('N'), and low-quality reads. Transcriptomes were separately assembled de novo using Trinity (<http://trinityrnaseq.sourceforge.net/>) as previously described [13]. In brief, clean reads with a certain overlap length were initially combined to form long fragments without N, termed contigs. Related contigs were clustered using the TGICL software to yield unigenes (without N) that could not be extended on either end, and redundancies were removed to acquire non-redundant unigenes. Sense and antisense strand ORFs were predicted by Getorf (<http://emboss.sourceforge.net/apps/cvs/emboss/apps/getorf.html>). Unigenes were first annotated with the COG, GO, and KEGG databases. The Swissprot and NR databases were used for further exploration of the candidate olfactory genes of *Ambrostoma quadriimpressum*. The olfactory genes of *Tribolium castaneum*, *Ips typographus* and *Dendroctonus ponderosae* were also blasted with a local Unigene database. After identification, candidate olfactory genes were classified according to their length, ORF, start and stop codons, conserved Cys locations, signal peptides and transmembrane domains. For OBPs and CSPs, the obtained ORF sequences were first aligned by MUSCLE [25]; additionally, the number and location of Cys amino acids from each candidate gene were manually checked and aligned with their "best hit" OBPs from other coleopteran species, Signal peptides were predicted using SignalP 4.1

server ([www.cbs.dtu.dk/services/SignalP](http://www.cbs.dtu.dk/services/SignalP)). For ORs and IRs, transmembrane regions were predicted by the TMHMM2.0 online tool (<http://www.cbs.dtu.dk/services/TMHMM/>). Further alignments of SNMPs and their isoforms in *A. quadriimpressum* and *Tribolium castaneum* were performed by ESPript (<http://esprict.ibcp.fr/ESPript/cgi-bin/ESPript.cgi>). The expression level of each identified gene from the antenna and leg was predicted with the FPKM method (Fragments per Kb per million reads) [26], and the FKPM values were analyzed and output as TIF files with Graphpad Prism 5.0 (GraphPad Software, La Jolla, CA, USA). The nucleotide sequences of each identified olfactory gene are listed in [S1 Table](#).

## Motif analysis

A total of 197 OBPs and 86 CSPs from *A. quadriimpressum*, *T. castaneum*, *D. ponderosa*, *I. typographus*, *M. alternatus*, *L. decemlineata*, *T. molitor*, *A. corpulenta* and *D. valens* were used for motif and pattern analysis among Coleoptera. The sequence integrity of the chosen OBPs and CSPs were confirmed manually by ORF length and the location of conserved Cys amino acids. The MEME 4.10.2 and MAST online software (<http://meme.nbcr.net/meme/>) were used to discover and analyze the motifs [27]. The parameter settings were as follows: minimum width = 6, maximum width = 10, and maximum number of motifs to find = 8. After that, each identified motif was further evaluated against the Ensembl Genome and Swiss Protein databases to find the best match by MAST. It should be noted that the PBP family was not used in this analysis because the putative PBPs recovered from Coleoptera were mostly partial sequences.

## Homology Analysis

A neighbor-joining (NJ) tree was constructed with MEGA version 6 [28] and the Jones-Taylor-Thornton model. The olfactory gene sequences of other insects were first transcribed into their amino acid sequences using the ORF finder (<http://www.ncbi.nlm.nih.gov/gorf/gorf.html>) and aligned by MUSCLE. Olfactory genes of other coleopteran species were obtained from the NCBI and EMBL-EBI (<http://www.ebi.ac.uk/services>) databases. Bootstrap support values were based on 1000 replicates. All of the candidate olfactory genes were named according to the nomenclature system described previously [29]. The olfactory genes from different species were marked with different colors and generated with Figtree 1.42 software (<http://tree.bio.ed.ac.uk/software/figtree/>).

## RT-PCR and RT-qPCR Validation

Fifteen OBPs, 9 CSPs, 17 ORs, 9 IRs and 2 SNMPs that were predicted to be highly abundant in antenna or legs or had complete ORFs were selected for further analysis. The cDNA samples for semi-quantitative reverse-transcription PCR and quantitative reverse-transcription PCR were prepared as described above. For the expression profile and semi-quantitative RT-PCR experiments, 1- $\mu$ l quantified cDNA samples from the antenna and legs of both males and females were used as the template.  $\beta$ -Actin was used as an internal control. The PCR conditions were as follows: 1 min and 30 s at 94°C and then 30 cycles at 94°C for 30 s, 45°C for 30 s, 68°C for 30 s and 68°C for 7 min, with a final volume of 25  $\mu$ l. After the PCR reactions were finished, 8  $\mu$ l aliquots of each PCR reaction was analyzed on 1% agarose gels. RT-qPCR (qPCR) was performed using the StepOne Plus Real-Time PCR Detection System (Bio-Rad, Hercules, CA, USA) and TransStar Tip Top Green qPCR Supermix (Transgen Biotech, Beijing, China). The  $\beta$ -actin gene was used as an internal control:  $\beta$ -actin forward and reverse, 5' -AACGATACCGTGTTC AATGG-3' and 5' -CATCGTCGGTCGTCCAAG-3'. PCR reagents were used following the manufacturer's instructions, and the PCR conditions were as follows: 94°C for 30 s, followed by 40 cycles of 94°C for 5 s, 60°C for 15 s, and 72°C for 34 s.

RT-qPCR data analysis was performed using the  $2^{-\Delta\Delta CT}$  method. All of the primers used in this experiment were designed with Array Designer 4.3 (PRIMER Biosoft, Palo Alto, CA, USA) and are listed in [S2 Table](#). The qPCR data were analyzed and output as TIF files using Graphpad Prism 5.0. For RT-PCR, the intensity of target bands were analyzed and compared using ImageJ 1.6 (<http://rsb.info.nih.gov/ij/>).

Finally, an expression level heatmap was created with Hem I [30] to visually compare all of the candidate olfactory genes based on the following set: 1.  $\text{Log}_2$  (Antenna FKPM/ Leg FKPM); 2.  $\text{Log}_2$  (Antenna relative fold change/Non-olfactory organ relative fold change (average values of wing, leg and thorax)); 3.  $\text{Log}_2$  (Intensity of target bands from antenna/Intensity of target bands from the non-olfactory organ). The absolute value of  $\text{log}_2$  ratio  $\geq 0$  was set as the threshold for determining the difference in gene expression difference between the two organs. After the expression data were obtained, they were normalized to  $\pm 1$  by their range, and an expression heatmap was generated. Value  $> 0$  indicate that the gene shows olfactory specificity, whereas when the value  $< 0$ , it indicates that the gene does not show olfactory specificity. Considering the differences between the three methods (RNA-seq, RT-PCR and RT-qPCR), we only drew conclusions when the results of all three experiments were consistent.

## Results

### Transcriptome Overview

After the raw data were filtered using the strategy described above, approximately 102.9 million and 97.3 million clean reads comprising 25.93 and 24.51 gigabases were obtained from the antenna and leg libraries respectively. Assemblies led to the generation of 68,737 bar-coded unigenes. The dataset was 55.13 megabases in size, with a mean length of 805 nt and an N50 of 1,609 nt. Therefore, 21.12% of the Unigenes exceeded 1,000 nt in length. Through annotation by BLASTx using the GO, Swissprot, COG, KEGG and NR databases, 34344 unigenes were matched to known proteins ([Table 1](#)). All of the SRA data used in this study were uploaded to NCBI with accession numbers SRS876374 and SRS876375.

### Overall Comparison of Transcription in Olfactory and Non-olfactory Tissues

GO annotation showed that there was no large difference between the genes with different functions. In most cases, the gene numbers in the leg were only slightly higher than those in the antenna, except for genes with “binding”, “molecular transducer”, “nucleic acid binding transcription factor” and “receptor” activities. This finding is not surprising because the reception, binding and signal transduction roles of the insect antenna have been suggested at the transcriptional level ([Fig 1A](#)). KEGG pathway annotation showed that differentially expressed genes exist in many pathways. For antenna, the expression levels of genes relevant to “Oxidative phosphorylation (111/321)”, “Glycine, serine and threonine metabolism (26/53)”, “Valine, leucine and isoleucine degradation (33/90)”, “Citrate cycle (31/84)” and “Tryptophan metabolism (22/61)” pathways were much higher than those of in legs ([Fig 1B](#)), which suggested that the olfactory reception process in the antenna of *A. quadriimpressum* is highly reliant on oxidative phosphorylation for energy and amino acid metabolic pathways. Detailed information on these differentially expressed genes will require further studies.

### Identification of Candidate Olfactory Genes

The unigenes related to candidate chemosensory receptors were identified by a keyword search of the BLASTx annotation. To further explore the olfactory genes, a local blast was performed

Table 1. Overview of transcriptome data from the antenna and leg of *A. quadriimpressum*.

|                  | Raw Data     |                                  | Contig               |                  |                    | Transcripts        |              |            |
|------------------|--------------|----------------------------------|----------------------|------------------|--------------------|--------------------|--------------|------------|
|                  | Antenna      | Leg                              | Contigs Length       | Total Number     | Percentage         | Transcripts Length | Total Number | Percentage |
| <b>ReadSum</b>   | 102967703    | 97331200                         | 0–300                | 1768015          | 0.9722             | 200–300            | 32669        | 0.2315     |
| <b>BaseSum</b>   | 25934264413  | 24518009356                      | 300–500              | 19682            | 0.0108             | 300–500            | 24451        | 0.1733     |
| <b>GC(%)</b>     | 41.22        | 43.05                            | 500–1000             | 14181            | 0.0078             | 500–1000           | 25375        | 0.1798     |
| <b>N(%)</b>      | 0.14         | 0.14                             | 1000–2000            | 9404             | 0.0052             | 1000–2000          | 26314        | 0.1865     |
| <b>Q20%</b>      | 94.61        | 94.56                            | 2000+                | 7260             | 0.004              | 2000+              | 32288        | 0.2288     |
| <b>CycleQ20%</b> | 100          | 100                              | Total Number         | 1818543          |                    | Total Number       | 141097       |            |
| <b>Q30%</b>      | 90.86        | 90.67                            | Total Length         | 143898458        |                    | Total Length       | 196851121    |            |
|                  |              |                                  | N50 Length           | 145              |                    | N50 Length         | 2712         |            |
|                  |              |                                  | Mean Length          | 79.12843304      |                    | Mean Length        | 1395.147459  |            |
| Unigene          |              | Functional annotation of Unigene |                      |                  |                    |                    |              |            |
| Unigenes Length  | Total Number | Percentage                       | Anno_Database        | Annotated_Number | 300< = length<1000 | length> = 1000     |              |            |
| 200–300          | 26683        | 0.3882                           | COG_Annotation       | 9782             | 3412               | 4787               |              |            |
| 300–500          | 16116        | 0.2345                           | GO_Annotation        | 19209            | 7432               | 7074               |              |            |
| 500–1000         | 11421        | 0.1662                           | KEGG_Annotation      | 9428             | 3501               | 3951               |              |            |
| 1000–2000        | 7841         | 0.1141                           | Swissprot_Annotation | 20096            | 7387               | 9055               |              |            |
| 2000+            | 6676         | 0.0971                           | nr_Annotation        | 34104            | 13737              | 12171              |              |            |
| Total Number     | 68737        |                                  | All_Annotated        | 34344            | 13816              | 12176              |              |            |
| Total Length     | 55233166     |                                  |                      |                  |                    |                    |              |            |
| N50 Length       | 1609         |                                  |                      |                  |                    |                    |              |            |
| Mean Length      | 803.5434482  |                                  |                      |                  |                    |                    |              |            |

doi:10.1371/journal.pone.0147144.t001

on the *A. quadriimpressum* unigene database based on the known olfactory sequences of *Tribolium castaneum*, *Ips typographus* and *Dendroctonus ponderosae*, and 16 OBPs, 10 CSPs, 34 ORs, 20 IRs and 2 SNMPs and their isoforms were identified. As such, 15 OBPs, 9 CSPs, 18 ORs, 6 IRs and 2 SNMPs were predicted to be complete ORFs by the following standards: 1. For OBPs and CSPs, those with a complete ORF length greater than 100 aa with locally conserved Cys amino acids. 2. Complete ORF of ORs and IRs were identified by their length, number and the location of their transmembrane regions. 3. SNMPs were aligned and compared with other coleopteran species to confirm their importance. The detailed information for each identified olfactory gene is listed in Table 2 according to their category. The calculated expression values based on the FKPM method of all olfactory genes are also listed (Table 2).

### Motif pattern analysis of Candidate OBPs and CSPs

Eight motifs with high E-values were discovered from 197 Coleoptera OBPs, and the 10 most common motif patterns were identified. Motif 6 and motif 1 were highly conserved and existed in nearly all of the common patterns except pattern 2 and pattern 4, as well as motif 3, motif 4, motif 8 and motif 2. Motif 5, motif 1 and motif 7 clustered together, whereas motif 6 is localized separately on the N-terminus. The most common pattern in the coleopteran OBPs was 6-3-2-4-5-1 with a percentage of 7.1% (14/197), which suggested a comparative pattern varies in Coleoptera OBPs. Moreover, AquaOBP2 showed a motif of pattern 3-2-4 (13/197), and AquaOBP6 had a 6-3-2-4-1 (10/197) motif. AquaOBP4 had 6-3-2-4 (9/197) motif and AquaOBP4

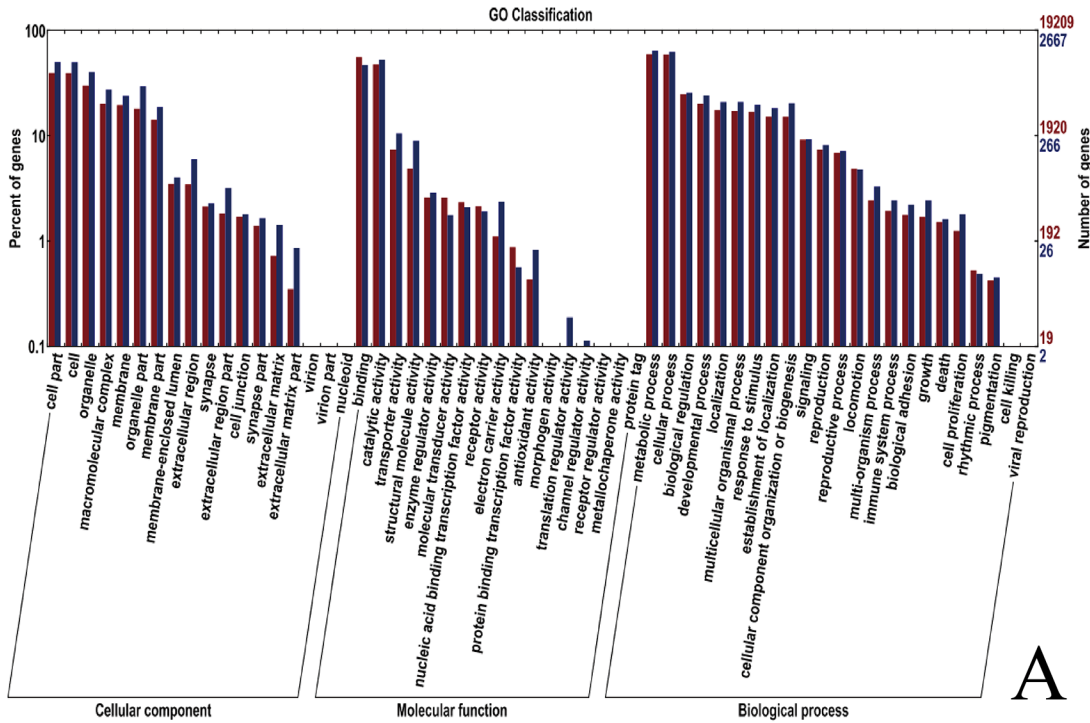

A

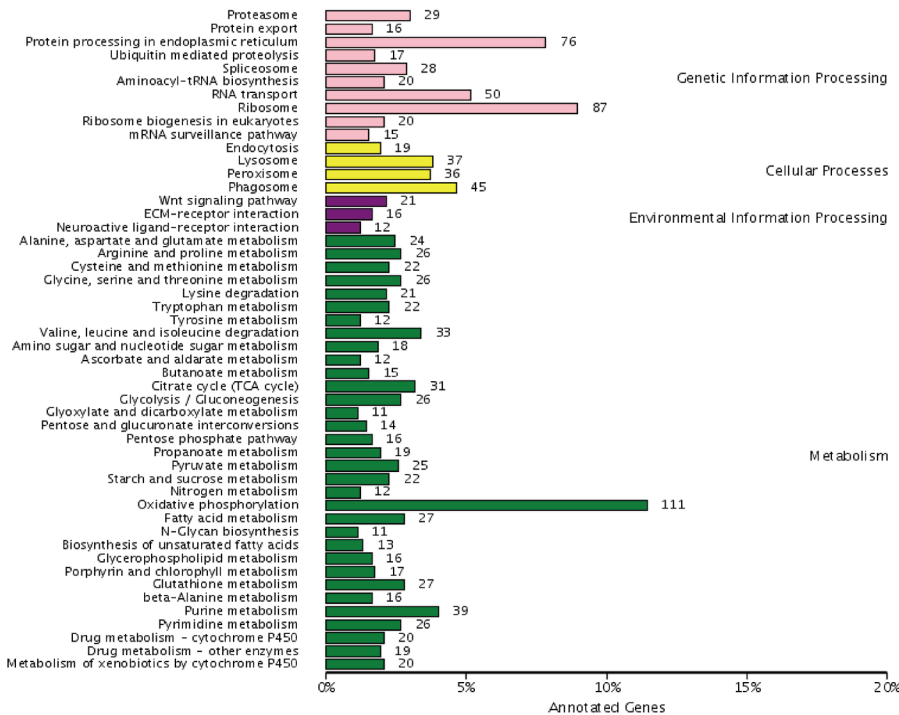

**Fig 1. Comparison of functional annotations in olfactory and non-olfactory tissue derived transcripts.** A. Comparison of GO annotation functional genes. Red indicates leg, while blue indicates antenna; B. KEGG pathway annotations. The bar represents the number of antenna/leg gene ratios for relevant pathways.

doi:10.1371/journal.pone.0147144.g001



**Table 2. Detailed information on the candidate olfactory genes of *A. quadriimpresum*.**

| Gene name  | Unigene ID      | ORF (aa) | Status       | FPKM (Antenna /Leg) | BLASTx best hit                                                                           | Gene ID        | Signal Peptide | TMD |
|------------|-----------------|----------|--------------|---------------------|-------------------------------------------------------------------------------------------|----------------|----------------|-----|
| AquaOBP 1  | c18871.graph_c0 | 126      | Complete ORF | 326.34/3.01         | odorant binding protein 05 [Tribolium castaneum]                                          | EFA05677.1     |                |     |
| AquaOBP C1 | c28544.graph_c0 | 128      | Complete ORF | 87.41/1.59          | odorant binding protein C13 [Tribolium castaneum]                                         | EEZ97789.1     |                |     |
| AquaOBP 2  | c29644.graph_c0 | 125      | Complete ORF | 22.75/0.61          | odorant binding protein 05 [Tribolium castaneum]                                          | EFA05677.1     |                |     |
| AquaOBP C2 | c24269.graph_c0 | 169      | Complete ORF | 10.71/36.01         | minus-C odorant binding protein 4 [Batocera horsfieldi]                                   | ADD82417.1     |                |     |
| AquaOBP 3  | c29196.graph_c1 | 142      | Complete ORF | 1.25/0.49           | odorant binding protein 09 [Tribolium castaneum]                                          | EFA10713.1     |                |     |
| AquaOBP C3 | c29310.graph_c0 | 137      | Complete ORF | 0.55/190.4          | minus-C odorant binding protein 4 [Batocera horsfieldi]                                   | ADD82417.1     |                |     |
| AquaOBP 4  | c29019.graph_c0 | 145      | Complete ORF | 1225.47/1.8         | odorant binding protein 09 [Tribolium castaneum]                                          | EFA10713.1     |                |     |
| AquaOBP C4 | c35447.graph_c0 | 134      | Complete ORF | 0.83/33.47          | minus-C odorant binding protein 4 [Batocera horsfieldi]                                   | ADD82417.1     |                |     |
| AquaOBP 5  | c24520.graph_c0 | 250      | Complete ORF | 2.94/3.3            | odorant binding protein 11 [Tribolium castaneum]                                          | EFA05695.1     |                |     |
| AquaOBP C5 | c30996.graph_c0 | 135      | Complete ORF | 185.9/1.96          | minus-C odorant binding protein 2 [Batocera horsfieldi]                                   | ADD70031.1     |                |     |
| AquaOBP 6  | c6376.graph_c0  | 150      | Complete ORF | 134.95/172.13       | odorant binding protein 19 [Tribolium castaneum]                                          | EFA02960.1     |                |     |
| AquaOBP C6 | c24312.graph_c0 | 150      | Complete ORF | 184.45/105.61       | odorant binding protein 1 [Monochamus alternatus]                                         | AGH70097.1     |                |     |
| AquaOBP 7  | c32760.graph_c0 | 153      | Complete ORF | 38.38/1.23          | PREDICTED: general odorant-binding protein 28a [Tribolium castaneum]                      | XP_008200270.1 |                |     |
| AquaOBP C7 | c18087.graph_c0 | 119      | Complete ORF | 0.02/0.75           | odorant binding protein C20 [Tribolium castaneum]                                         | EFA01425.1     |                |     |
| AquaOBP 8  | c13307.graph_c0 | 152      | Complete ORF | 0.46/0              | putative odorant binding protein [Stomoxys calcitrans]                                    | ADG96060.1     |                |     |
| AquaCSP 1  | c27044.graph_c0 | 117      | Complete ORF | 12.74/65.65         | PREDICTED: Tribolium castaneum chemosensory protein 1 (Csp1), transcript variant X2, mRNA | XM_008202713.1 | Yes            |     |
| AquaCSP 2  | c24876.graph_c0 | 110      | 5' 3'lost    | 0.64/0              | Tribolium castaneum chemosensory protein 10 (Csp10), mRNA                                 | NM_001045813.1 | No             |     |
| AquaCSP 3  | c43925.graph_c0 | 107      | Complete ORF | 0.77/0              | Tribolium castaneum chemosensory protein 8 (Csp8), mRNA                                   | NM_001045825.1 | Yes            |     |
| AquaCSP 4  | c23773.graph_c0 | 129      | Complete ORF | 405.75/9.56         | Tribolium castaneum chemosensory protein 12 (Csp12), mRNA                                 | NM_001045815.1 | Yes            |     |
| AquaCSP 5  | c22795.graph_c0 | 138      | Complete ORF | 0.55/0.58           | Tribolium castaneum chemosensory protein 11 (Csp11), mRNA                                 | NM_001045814.1 | Yes            |     |
| AquaCSP 6  | c29991.graph_c0 | 120      | Complete ORF | 2.21/0              | Tribolium castaneum chemosensory protein 5 (Csp5), mRNA                                   | NM_001045822.1 | Yes            |     |
| AquaCSP 7  | c37487.graph_c0 | 318      | Complete ORF | 2.05/4.73           | PREDICTED: Tribolium castaneum chemosensory protein 6 (Csp6), transcript variant X2, mRNA | XM_008195554.1 | Yes            |     |
| AquaCSP 8  | c42137.graph_c0 | 135      | Complete ORF | 915.66/11.27        | Tribolium castaneum chemosensory protein 4 (Csp4), mRNA                                   | NM_001045820.1 | Yes            |     |
| AquaCSP 9  | c29933.graph_c0 | 128      | Complete ORF | 119.04/4.45         | PREDICTED: Tribolium castaneum chemosensory protein 7 (Csp7), transcript variant X1, mRNA | XM_008195555.1 | Yes            |     |

(Continued)

Table 2. (Continued)

| Gene name         | Unigene ID      | ORF (aa) | Status       | FPKM (Antenna /Leg) | BLASTx best hit                                                                           | Gene ID        | Signal Peptide | TMD |
|-------------------|-----------------|----------|--------------|---------------------|-------------------------------------------------------------------------------------------|----------------|----------------|-----|
| <b>AquaCSP 10</b> | c14115.graph_c0 | 122      | Complete ORF | 121.34/156.05       | PREDICTED: Tribolium castaneum chemosensory protein 7 (Csp7), transcript variant X1, mRNA | XM_008195555.1 | Yes            |     |
| <b>AquaOrco</b>   | c41146.graph_c0 | 479      | Complete ORF | 40.85/18.62         | PREDICTED: Tribolium castaneum odorant receptor coreceptor (LOC661975), mRNA              | XM_008196471.1 |                | 7   |
| <b>AquaOR 1</b>   | c25389.graph_c0 | 209      | 5'lost       | 1.29/0              | PREDICTED: Tribolium castaneum olfactory receptor 12 (LOC663463), mRNA                    | XM_008203047.1 |                | 3   |
| <b>AquaOR 2</b>   | c20513.graph_c0 | 221      | 5'lost       | 0.8/0               | PREDICTED: Tribolium castaneum odorant receptor 9a-like (LOC103314420), mRNA              | XM_008200489.1 |                | 2   |
| <b>AquaOR 3</b>   | c30597.graph_c0 | 353      | 5'lost       | 2.2/0               | PREDICTED: Tribolium castaneum putative odorant receptor 71a (LOC103314297), mRNA         | XM_008199934.1 |                | 7   |
| <b>AquaOR 4</b>   | c32448.graph_c0 | 423      | Complete ORF | 5.05/0.07           | PREDICTED: Tribolium castaneum putative odorant receptor 71a (LOC103314297), mRNA         | XM_008199934.1 |                | 7   |
| <b>AquaOR 5</b>   | c19494.graph_c0 | 194      | 5'lost       | 0.38/0.27           | PREDICTED: Tribolium castaneum putative odorant receptor 71a (LOC103314297), mRNA         | XM_008199934.1 |                | 3   |
| <b>AquaOR 6</b>   | c43305.graph_c0 | 364      | Complete ORF | 0.65/0              | PREDICTED: Tribolium castaneum olfactory receptor 12 (LOC663463), mRNA                    | XM_008203047.1 |                | 6   |
| <b>AquaOR 7</b>   | c5656.graph_c0  | 106      | 5'3'lost     | 0.66/0.03           | PREDICTED: Tribolium castaneum olfactory receptor 20 (LOC655178), mRNA                    | XM_961697.1    |                | 2   |
| <b>AquaOR 8</b>   | c35091.graph_c0 | 369      | Complete ORF | 2.1/0.34            | PREDICTED: Tribolium castaneum odorant receptor (LOC100142012), mRNA                      | XM_001814810.1 |                | 5   |
| <b>AquaOR 9</b>   | c25921.graph_c0 | 405      | Complete ORF | 5.43/2.42           | PREDICTED: Tribolium castaneum olfactory receptor 12 (LOC663463), mRNA                    | XM_008203047.1 |                | 6   |
| <b>AquaOR 10</b>  | c39137.graph_c0 | 327      | Complete ORF | 5.14/1.33           | PREDICTED: Tribolium castaneum odorant receptor 25 (LOC100141798), mRNA                   | XM_001810453.2 |                | 5   |
| <b>AquaOR 11</b>  | c34947.graph_c0 | 247      | 3'lost       | 2.58/0.03           | PREDICTED: Tribolium castaneum odorant receptor 67c-like (LOC103313327), mRNA             | XM_008196326.1 |                | 4   |
| <b>AquaOR 12</b>  | c20227.graph_c0 | 128      | 5'lost       | 0.14/0.79           | PREDICTED: Tribolium castaneum olfactory receptor 3 (LOC664552), mRNA                     | XM_008194185.1 |                | 3   |
| <b>AquaOR 13</b>  | c56184.graph_c0 | 107      | 5'lost       | 0.23/0              | PREDICTED: Tribolium castaneum odorant receptor Or1-like (LOC103312189), mRNA             | XM_008192202.1 |                | 2   |
| <b>AquaOR 14</b>  | c38388.graph_c0 | 249      | 5'lost       | 16.84/0.41          | PREDICTED: Tribolium castaneum odorant receptor Or1-like (LOC103312189), mRNA             | XM_008192202.1 |                | 2   |
| <b>AquaOR 15</b>  | c20583.graph_c0 | 378      | Complete ORF | 2.15/0.1            | PREDICTED: Tribolium castaneum olfactory receptor 12 (LOC663463), mRNA                    | XM_008203047.1 |                | 5   |
| <b>AquaOR 16</b>  | c45693.graph_c0 | 167      | 5'3'lost     | 0.64/0              | PREDICTED: Tribolium castaneum odorant receptor (LOC661659), transcript variant X2, mRNA  | XM_008200026.1 |                | 2   |
| <b>AquaOR 17</b>  | c18751.graph_c0 | 314      | Complete ORF | 0.98/0              | PREDICTED: Tribolium castaneum olfactory receptor 12 (LOC663463), mRNA                    | XM_008203047.1 |                | 5   |
| <b>AquaOR 18</b>  | c20804.graph_c0 | 377      | Complete ORF | 1.55/0.02           | Tribolium castaneum or8 gene for olfactory receptor 8                                     | AM689910.1     |                | 4   |
| <b>AquaOR 19</b>  | c7871.graph_c0  | 123      | 5'3'lost     | 0.76/0              | PREDICTED: Tribolium castaneum odorant receptor Or1-like (LOC103312189), mRNA             | XM_008192202.1 |                | 2   |
| <b>AquaOR 20</b>  | c32943.graph_c0 | 387      | Complete ORF | 1.59/0              | PREDICTED: Tribolium castaneum odorant receptor (LOC100142012), mRNA                      | XM_001814810.1 |                | 7   |
| <b>AquaOR 21</b>  | c30258.graph_c0 | 148      | 5'lost       | 2.21/0.22           | PREDICTED: Tribolium castaneum odorant receptor 85b-like (LOC103314252), mRNA             | XM_008199720.1 |                | 3   |

(Continued)

Table 2. (Continued)

| Gene name | Unigene ID      | ORF (aa) | Status       | FPKM (Antenna /Leg) | BLASTx best hit                                                                                                       | Gene ID        | Signal Peptide | TMD |
|-----------|-----------------|----------|--------------|---------------------|-----------------------------------------------------------------------------------------------------------------------|----------------|----------------|-----|
| AquaOR 22 | c34706.graph_c0 | 372      | Complete ORF | 1.5/0.04            | PREDICTED: Tribolium castaneum odorant receptor 49b-like (LOC100141914), mRNA                                         | XM_001812209.1 |                | 6   |
| AquaOR 23 | c29459.graph_c0 | 323      | Complete ORF | 1.67/0.01           | PREDICTED: Tribolium castaneum odorant receptor Or2-like (LOC103314064), mRNA                                         | XM_008198934.1 |                | 5   |
| AquaOR 24 | c30896.graph_c0 | 375      | Complete ORF | 9.89/0.5            | PREDICTED: Tribolium castaneum olfactory receptor 12 (LOC663463), mRNA                                                | XM_008203047.1 |                | 6   |
| AquaOR 25 | c31144.graph_c0 | 129      | 3'lost       | 1.44/0.55           | Tribolium castaneum or11 gene for olfactory receptor 11                                                               | AM689913.1     |                | 0   |
| AquaOR 26 | c11347.graph_c0 | 347      | Complete ORF | 2.95/0              | PREDICTED: Tribolium castaneum olfactory receptor 15 (LOC100142153), mRNA                                             | XM_008200490.1 |                | 6   |
| AquaOR 27 | c31817.graph_c0 | 291      | 5'lost       | 0.9/0.22            | PREDICTED: Tribolium castaneum odorant receptor Or1-like (LOC103312189), mRNA                                         | XM_008192202.1 |                | 5   |
| AquaOR 28 | c43416.graph_c0 | 151      | 5' 3'lost    | 0.68/0              | PREDICTED: Tribolium castaneum odorant receptor Or1-like (LOC103312189), mRNA                                         | XM_008192202.1 |                | 3   |
| AquaOR 29 | c34669.graph_c0 | 303      | Complete ORF | 5.34/0.29           | PREDICTED: Tribolium castaneum odorant receptor (LOC661659), transcript variant X1, mRNA                              | XM_967808.2    |                | 5   |
| AquaOR 30 | c22874.graph_c0 | 256      | 3'lost       | 0.98/0              | PREDICTED: Tribolium castaneum odorant receptor 85b-like (LOC103314252), mRNA                                         | XM_008199720.1 |                | 4   |
| AquaOR 31 | c27286.graph_c0 | 341      | Complete ORF | 0.35/2.82           | PREDICTED: Tribolium castaneum odorant receptor 67c-like (LOC103313327), mRNA                                         | XM_008196326.1 |                | 5   |
| AquaOR 32 | c31772.graph_c0 | 380      | Complete ORF | 20.18/1.63          | PREDICTED: Tribolium castaneum odorant receptor 46a, isoform B-like (LOC103312238), mRNA                              | XM_008192395.1 |                | 6   |
| AquaOR 33 | c35731.graph_c1 | 392      | Complete ORF | 2.03/0.91           | PREDICTED: Tribolium castaneum olfactory receptor 12 (LOC663463), mRNA                                                | XM_008203047.1 |                | 5   |
| AqualR 1  | c30209.graph_c0 | 512      | 5'3'lost     | 1.5/0.24            | PREDICTED: Tribolium castaneum glutamate receptor ionotropic, NMDA 2B (LOC660406), transcript variant X2, mRNA        | XM_008193055.1 |                | 1   |
| AqualR 2  | c46148.graph_c0 | 111      | 5'3'lost     | 0.12/0.33           | PREDICTED: Tribolium castaneum glutamate receptor ionotropic, kainate 2-like (LOC655107), mRNA                        | XM_008192857.1 |                | 0   |
| AqualR 3  | c27639.graph_c0 | 255      | 5'lost       | 0.66/0.17           | PREDICTED: Tribolium castaneum glutamate receptor ionotropic, NMDA 2B (LOC660406), transcript variant X1, mRNA        | XM_008193054.1 |                | 2   |
| AqualR 4  | c38283.graph_c0 | 890      | Complete ORF | 0.46/2.95           | PREDICTED: Tribolium castaneum glutamate receptor ionotropic, kainate 2-like (LOC663773), mRNA                        | XM_008203439.1 |                | 3   |
| AqualR 5  | c34644.graph_c0 | 889      | Complete ORF | 17.27/59.19         | PREDICTED: Tribolium castaneum glutamate receptor ionotropic, kainate 2-like (LOC655031), transcript variant X3, mRNA | XM_961527.2    |                | 3   |
| AqualR 6  | c36987.graph_c0 | 423      | 5'lost       | 9.84/74.13          | PREDICTED: Tribolium castaneum glutamate receptor ionotropic, kainate 3-like (LOC657048), transcript variant X2, mRNA | XM_008200236.1 |                | 3   |
| AqualR 7  | c40757.graph_c0 | 485      | 3'lost       | 3.73/34.03          | PREDICTED: Tribolium castaneum glutamate receptor ionotropic, kainate 2-like (LOC655031), transcript variant X3, mRNA | XM_961527.2    |                | 1   |
| AqualR 8a | c33131.graph_c0 | 721      | Complete ORF | 43.23/9.22          | PREDICTED: Tribolium castaneum glutamate receptor ionotropic, kainate 2 (LOC656746), mRNA                             | XM_963253.2    |                | 3   |

(Continued)

Table 2. (Continued)

| Gene name         | Unigene ID      | ORF (aa) | Status       | FPKM (Antenna /Leg) | BLASTx best hit                                                                                                       | Gene ID        | Signal Peptide | TMD |
|-------------------|-----------------|----------|--------------|---------------------|-----------------------------------------------------------------------------------------------------------------------|----------------|----------------|-----|
| <b>AqualR 9</b>   | c36130.graph_c0 | 343      | 5'3'lost     | 1.75/0.15           | PREDICTED: Tribolium castaneum glutamate receptor ionotropic, kainate 2-like (LOC655262), mRNA                        | XM_961791.3    |                | 1   |
| <b>AqualR 10</b>  | c46223.graph_c0 | 158      | 5'3'lost     | 0.23/0.31           | PREDICTED: Tribolium castaneum glutamate receptor ionotropic, kainate 2-like (LOC655107), mRNA                        | XM_008192857.1 |                | 1   |
| <b>AqualR 11</b>  | c36036.graph_c0 | 822      | Complete ORF | 3.15/13.03          | PREDICTED: Tribolium castaneum glutamate receptor ionotropic, kainate 2-like (LOC663805), mRNA                        | XM_969840.2    |                | 3   |
| <b>AqualR 12</b>  | c40210.graph_c1 | 260      | 3'lost       | 3.68/30.82          | PREDICTED: Tribolium castaneum glutamate receptor ionotropic, kainate 3-like (LOC657048), transcript variant X1, mRNA | XM_008200235.1 |                | 2   |
| <b>AqualR 13</b>  | c37308.graph_c0 | 143      | 5'lost       | 2.05/0.37           | PREDICTED: Tribolium castaneum glutamate receptor ionotropic, kainate 5 (LOC658055), mRNA                             | XM_008197243.1 |                | 1   |
| <b>AqualR 14</b>  | c23242.graph_c0 | 250      | 5'3'lost     | 1.15/0.21           | PREDICTED: Tribolium castaneum glutamate receptor ionotropic, kainate 2-like (LOC655262), mRNA                        | XM_961791.3    |                | 1   |
| <b>AqualR 15</b>  | c48352.graph_c0 | 142      | 5'3'lost     | 0.56/0              | PREDICTED: Tribolium castaneum glutamate receptor ionotropic, kainate 2-like (LOC663773), mRNA                        | XM_008203439.1 |                | 0   |
| <b>AqualR 16</b>  | c38169.graph_c0 | 798      | Complete ORF | 2.47/24.34          | PREDICTED: Tribolium castaneum glutamate receptor ionotropic, kainate 2 (LOC654966), mRNA                             | XM_961435.1    |                | 3   |
| <b>AqualR 25a</b> | c35322.graph_c0 | 922      | Complete ORF | 24.81/0.49          | PREDICTED: Tribolium castaneum glutamate receptor ionotropic, kainate 2 (LOC659899), mRNA                             | XM_008202574.1 |                | 3   |
| <b>AqualR 41a</b> | c37132.graph_c0 | 571      | 3'lost       | 1.63/0.07           | PREDICTED: Tribolium castaneum glutamate receptor ionotropic, delta-2 (LOC663559), mRNA                               | XM_008203436.1 |                | 1   |
| <b>AqualR 64a</b> | c25275.graph_c0 | 185      | 5'3'lost     | 1.46/0.67           | PREDICTED: Tribolium castaneum glutamate receptor ionotropic, kainate 3-like (LOC657048), transcript variant X2, mRNA | XM_008200236.1 |                | 1   |
| <b>AqualR 75q</b> | c49298.graph_c0 | 129      | 5'lost       | 0.46/0              | PREDICTED: Tribolium castaneum glutamate receptor ionotropic, kainate 2-like (LOC663773), mRNA                        | XM_008203439.1 |                | 1   |
| <b>SNMP 1</b>     | c37873.graph_c0 | 520      |              | 99.28/31.58         | PREDICTED: Tribolium castaneum sensory neuron membrane protein 1 (LOC100142232), mRNA                                 | XM_001816384.2 |                |     |
|                   | c39123.graph_c0 | 514      |              | 253.37/134.02       | PREDICTED: Tribolium castaneum sensory neuron membrane protein 1 (LOC100142232), mRNA                                 | XM_001816384.2 |                |     |
|                   | c6003.graph_c0  | 502      |              | 10.57/6.57          | PREDICTED: Tribolium castaneum sensory neuron membrane protein 1 (LOC100142232), mRNA                                 | XM_001816384.2 |                |     |
|                   | c28645.graph_c0 | 384      |              | 0.43/0.58           | PREDICTED: Tribolium castaneum sensory neuron membrane protein 1-like (LOC100142034), mRNA                            | XM_001816388.2 |                |     |
|                   | c28834.graph_c0 | 474      |              | 0.5/0               | PREDICTED: Tribolium castaneum sensory neuron membrane protein 1-like (LOC100142034), mRNA                            | XM_001816388.2 |                |     |
|                   | c39779.graph_c0 | 282      |              | 3.91/1.32           | PREDICTED: Tribolium castaneum sensory neuron membrane protein 1-like (LOC100142034), mRNA                            | XM_001816388.2 |                |     |

(Continued)

Table 2. (Continued)

| Gene name     | Unigene ID      | ORF (aa) | Status | FPKM (Antenna /Leg) | BLASTx best hit                                                                            | Gene ID        | Signal Peptide | TMD |
|---------------|-----------------|----------|--------|---------------------|--------------------------------------------------------------------------------------------|----------------|----------------|-----|
|               | c24728.graph_c0 | 299      |        | 0.89/0              | PREDICTED: Tribolium castaneum sensory neuron membrane protein 1-like (LOC100141821), mRNA | XM_001816389.2 |                |     |
|               | c36561.graph_c0 | 540      |        | 132.64/3.52         | PREDICTED: Tribolium castaneum sensory neuron membrane protein 1-like (LOC100141821), mRNA | XM_001816389.2 |                |     |
|               | c37047.graph_c0 | 536      |        | 221.73/108.11       | PREDICTED: Tribolium castaneum sensory neuron membrane protein 1-like (LOC100141821), mRNA | XM_001816389.2 |                |     |
|               | c39598.graph_c0 | 295      |        | 62.88/58.74         | PREDICTED: Tribolium castaneum sensory neuron membrane protein 1-like (LOC100141821), mRNA | XM_001816389.2 |                |     |
|               | c61337.graph_c0 | 35       |        | 0.33/0              | PREDICTED: Tribolium castaneum sensory neuron membrane protein 1-like (LOC100141821), mRNA | XM_001816389.2 |                |     |
| <b>SNMP 2</b> | c32778.graph_c0 | 406      |        | 1.25/0              | PREDICTED: Tribolium castaneum sensory neuron membrane protein 2 (LOC658533), mRNA         | XM_964915.2    |                |     |
|               | c35000.graph_c0 | 292      |        | 240.78/79.14        | PREDICTED: Tribolium castaneum sensory neuron membrane protein 2 (LOC658533), mRNA         | XM_964915.2    |                |     |
|               | c35827.graph_c0 | 488      |        | 157.2/73.47         | PREDICTED: Tribolium castaneum sensory neuron membrane protein 2 (LOC658533), mRNA         | XM_964915.2    |                |     |
|               | c37683.graph_c0 | 518      |        | 27.9/12.89          | PREDICTED: Tribolium castaneum sensory neuron membrane protein 2 (LOC658533), mRNA         | XM_964915.2    |                |     |
|               | c39298.graph_c0 | 542      |        | 7.84/19.58          | PREDICTED: Tribolium castaneum sensory neuron membrane protein 2 (LOC658533), mRNA         | XM_964915.2    |                |     |
|               | c45852.graph_c0 | 86       |        | 0.09/0.46           | PREDICTED: Tribolium castaneum sensory neuron membrane protein 2 (LOC658533), mRNA         | XM_964915.2    |                |     |
|               | c57679.graph_c0 | 57       |        | 0.39/0              | PREDICTED: Tribolium castaneum sensory neuron membrane protein 2 (LOC658533), mRNA         | XM_964915.2    |                |     |
|               | c28688.graph_c0 | 190      |        | 0.99/0              | PREDICTED: Tribolium castaneum sensory neuron membrane protein 2 (LOC658533), mRNA         | XM_964915.2    |                |     |
|               | c69846.graph_c0 | 54       |        | 0.17/0              | PREDICTED: Tribolium castaneum sensory neuron membrane protein 2 (LOC658533), mRNA         | XM_964915.2    |                |     |
|               | c16552.graph_c0 | 123      |        | 0.42/0              | PREDICTED: Tribolium castaneum sensory neuron membrane protein 2-like (LOC103314488), mRNA | XM_008200727.1 |                |     |
|               | c50846.graph_c0 | 56       |        | 0.47/0              | PREDICTED: Tribolium castaneum sensory neuron membrane protein 2-like (LOC103314488), mRNA | XM_008200727.1 |                |     |
|               | c34299.graph_c0 | 152      |        | 6.09/0.03           | PREDICTED: Tribolium castaneum sensory neuron membrane protein 2-like (LOC103314494), mRNA | XM_008200740.1 |                |     |
|               | c34299.graph_c1 | 353      |        | 6.99/0.04           | PREDICTED: Tribolium castaneum sensory neuron membrane protein 2-like (LOC103314494), mRNA | XM_008200740.1 |                |     |

(Continued)

Table 2. (Continued)

| Gene name | Unigene ID      | ORF (aa) | Status | FPKM (Antenna /Leg) | BLASTx best hit                                                                            | Gene ID        | Signal Peptide | TMD |
|-----------|-----------------|----------|--------|---------------------|--------------------------------------------------------------------------------------------|----------------|----------------|-----|
|           | c38331.graph_c0 | 573      |        | 27.69/10.37         | PREDICTED: Tribolium castaneum sensory neuron membrane protein 2-like (LOC103314494), mRNA | XM_008200740.1 |                |     |
|           | c50128.graph_c0 | 70       |        | 0.55/0              | PREDICTED: Tribolium castaneum sensory neuron membrane protein 2-like (LOC103314494), mRNA | XM_008200740.1 |                |     |
|           | c51674.graph_c0 | 110      |        | 0.56/0              | PREDICTED: Tribolium castaneum sensory neuron membrane protein 2-like (LOC103314494), mRNA | XM_008200740.1 |                |     |
|           | c8230.graph_c0  | 44       |        | 0.33/0              | PREDICTED: Tribolium castaneum sensory neuron membrane protein 2-like (LOC103314494), mRNA | XM_008200740.1 |                |     |

doi:10.1371/journal.pone.0147144.t002

a 6-3-8-2-1-7 (7/197) motif. Finally, AquaOBPC2 and AquaOBPC3 shared the same 6-4-1 (5/197) motif, whereas the motif pattern of the remaining AquaOBPs motif patterns exhibited more variety (Fig 2).

Compared with OBPs, the CSP motif patterns in Coleoptera were more highly conserved with two common patterns were discovered at a percentage of 66.28% (55/86). The most common CSP patterns were 4-5-1-6-2-7-3-8 (46/86), and AquaCSP 4/6/8/9/10 contained this pattern. The second most common pattern was 5-1-6-2-7-3-8, which is missing motif 4 at the N-terminus. No AquaCSPs were observed with this last motif pattern (Fig 3).

It is interesting that motif 6 in coleopteran OBPs had high similarity (E-value 6.9e-4) with Andropin sequences in *Drosophila mauritiana*, and motif 7 showed similarity (E-value 1.7e-1) with B-adaptin in *Arabidopsis thaliana*. These two proteins were previously identified as components in transmembrane signal transduction.

## Phylogenetic Analysis of Candidate Olfactory Genes

Sixteen candidate OBPs sorted phylogenetically as expected based on their highest sequence homology. Seven minus-C OBPs from *A. quadriimpresum* grouped together with the minus-C OBPs of other coleopteran species, whereas nine conserved OBPs of *A. quadriimpresum* were grouped together. No PBP or Plus-C family orthologs were observed in *A. quadriimpresum* (Fig 4). For CSPs, AquaCSP9 and AquaCSP10, AquaCSP6 and AquaCSP8, and AquaCSP4 and AquaCSP5 grouped into a single clade, whereas the other seven CSPs separated into different clades (Fig 5).

Thirty-four candidate ORs were identified including AquaORCO. AquaOr29/30/31/32 were grouped together and are orthologs of McOR50. AquaOR11 and AquaOR12 are orthologs of DponOR15 and ItypOR15, and AquaOR9 and AquaOR10 are orthologs of ItypOR11 and McarOr2. Additionally, AquaOR8, AquaOR20 and AquaOR21 grouped into same clade (Fig 6). However, because of the lack of de-orphanized ORs in coleopteran insects, the biological function of these candidate ORs requires further exploration. For IRs, IR8a, IR25a, IR41a, IR64a and IR75 orthologues were identified in *A. quadriimpresum*, but no IR68a, IR76b and IR93a orthologues were found (Fig 7). Additionally, 15 candidate IRs clustered away from known families, and we defined them as “unnamed or separated clades”. AquaIR4/5/6/9/10/11/12/14 were grouped together with AcorIRx. AquaIR8a and AquaIR25a were identified in *A. quadriimpresum*. According to previous research, these two IRs were phylogenetically highly

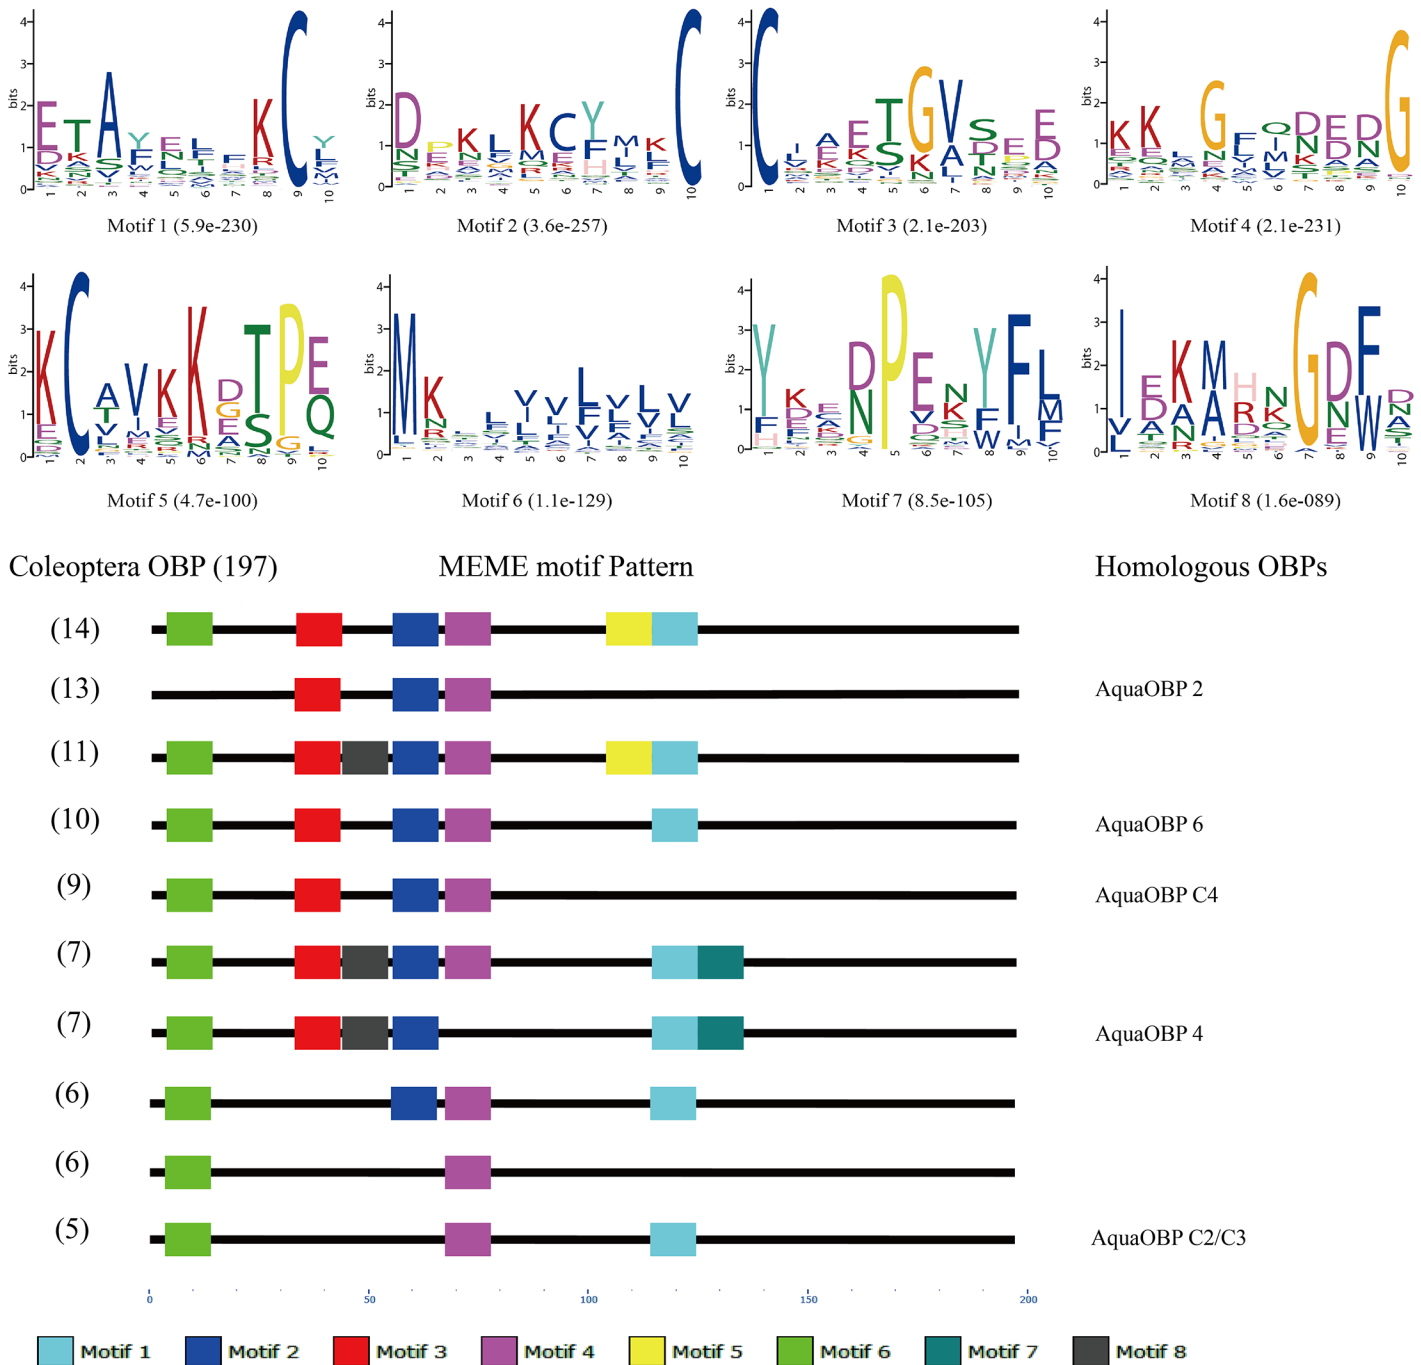

**Fig 2. Motif analysis of coleopteran OBPs.** Parameters used for motif analysis were minimum width = 6, maximum width = 10, and maximum number of motifs to find = 8. Different colored squares indicate the type and approximate location of each motif on the protein sequence, starting from the N-terminal.

doi:10.1371/journal.pone.0147144.g002

conserved and are considered to function as co-receptors [31, 32]. AquaIR64a orthologs in *Drosophila melanogaster* were shown to be required for acid avoidance behavior [33].

In total, 28 candidate SNMPs and their isoforms were identified. The amino acid sequences of two complete ORF unigenes were aligned with SNMP sequences of other coleopteran species; as a result, AquaSNMP1 and AquaSNMPs were more similar to *Tenebrio molitor* SNMPs

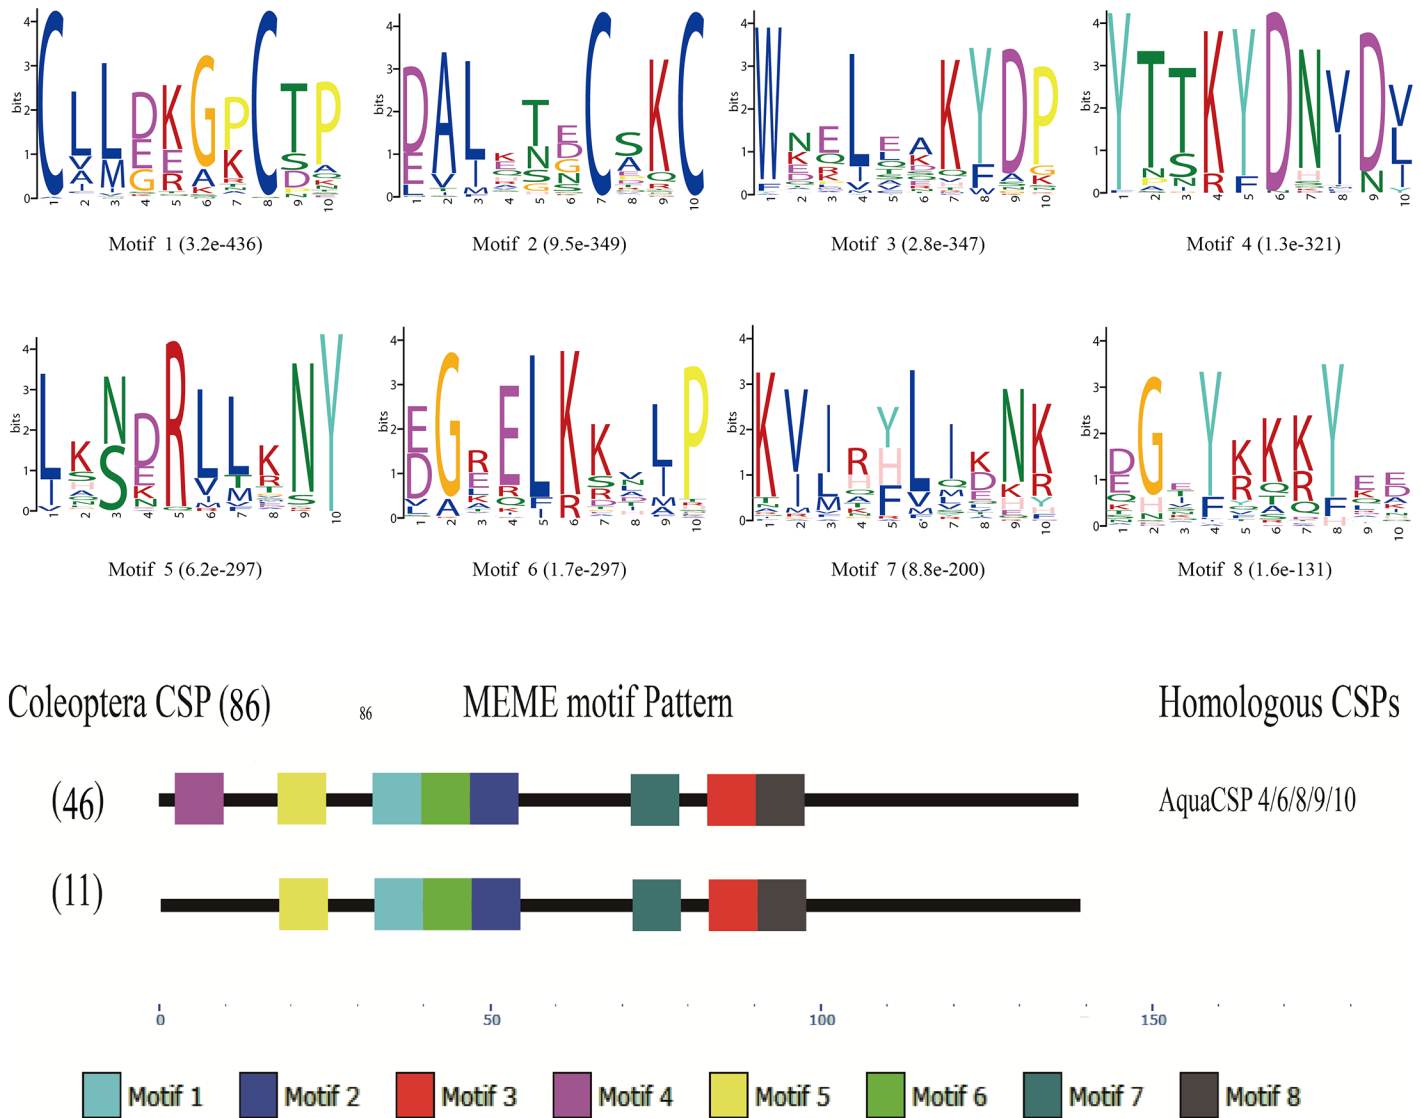

**Fig 3. Motif analysis of coleopteran CSPs.** Parameters used for motif analysis were minimum width = 6, maximum width = 10, and maximum number of motifs to find = 8. Different colored squares indicate the type and approximate location of each motif on the protein sequence, starting from the N-terminal.

doi:10.1371/journal.pone.0147144.g003

with identities of 58% and 42%, respectively. Six conserved serines were identified in AquaSNMPs, and another 52 highly conserved sites were also observed (Fig 8).

### Tissue- and Sex-specific Expressions of Candidate Olfactory Genes

Referring to the calculated expression values determined based on the FKPM methods, 52 candidate olfactory genes were selected to further explore tissue- and sex-specific expression. The selection standard was as follows: the expression level of the gene must be sufficiently high in the antenna (olfactory organs) or the legs (non-olfactory organs) for these genes to have important functions during the insect's lifespan. Additionally, if a gene was identified with a complete ORF to ensure the functional activity of the gene, it was included. As a result, 15 OBPs, 9 CSPs, 17 ORs, 9 IRs and 2 SNMPs were chosen for further validation.



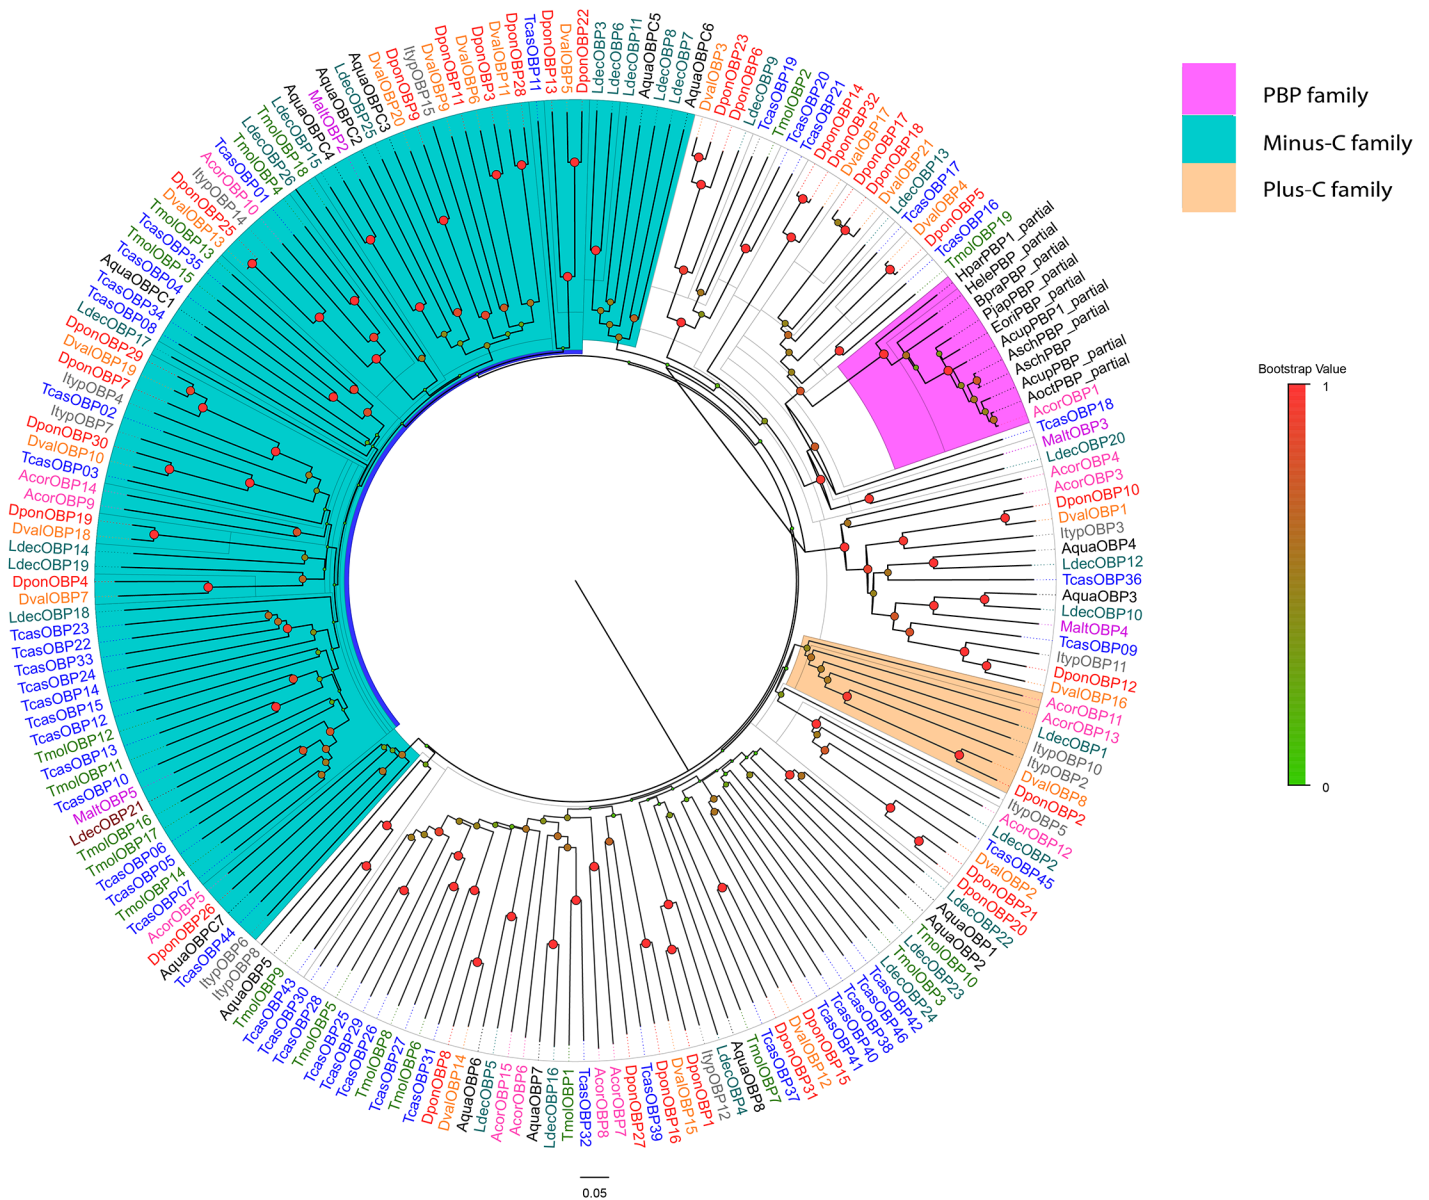

**Fig 4. Neighbor-joining tree of AquaOBPs.** Values indicated at the nodes are bootstrap values based on 1000 replicates; scale bar = 0.1. Aqua: *Ambrostoma quadriimpressum*; Tcas: *Tribolium castaneum*; Dpon: *Dendroctonus ponderosae*; Malt: *Monochamus alternatus*; Ldec: *Leptinotarsa decemlineata*; ltyp: *Ips typographus*; Tmol: *Tenebrio molitor*; Acor: *Anomala corpulenta*. Dval: *Dendroctonus valens*; Hpar: *Holotrichia parallela*; Hele: *Hylamorphia elegans*; Bpra: *Brachysternus prasinus*; Pjap: *Popillia japonica*; Eori: *Exomala orientalis*; Acup: *Anomala cuprea*; Asch: *Anomala schonfeldtii*; Aoct: *Anomala octiescostata*. Different colors indicate the types of OBPs.

doi:10.1371/journal.pone.0147144.g004

Semi-quantitative RT-PCR showed that all of the tested candidate olfactory genes were primarily male specific (Fig 9). AquaOBPC2/C3/C4/C7, AquaOBP8/C2/C3/C4/C7, AquaCSP5/6/7/10, AquaOR6/23/24/31, AquaIR4/5/11/14/16/64a showed non-olfactory specific expression, whereas AquaOBP1/2/4/7/C1/C5/C6, AquaCSP1/3/4/8/9, AquaOR9/10/14/15/17/20/22/26/29/32/33, AquaIR13/25a showed olfactory-specific expression. quaOBP4/C5, AquaCSP7/9/10, AquaOR17/24/32 and AquaIR4 were highly expressed in the antenna of males, suggesting that these genes are likely related to sex-specific behaviors in *A. quadriimpressum*, and unsurprisingly, the co-receptors AquaIR8a and AquaIR25a showed high and non-specific expression patterns.

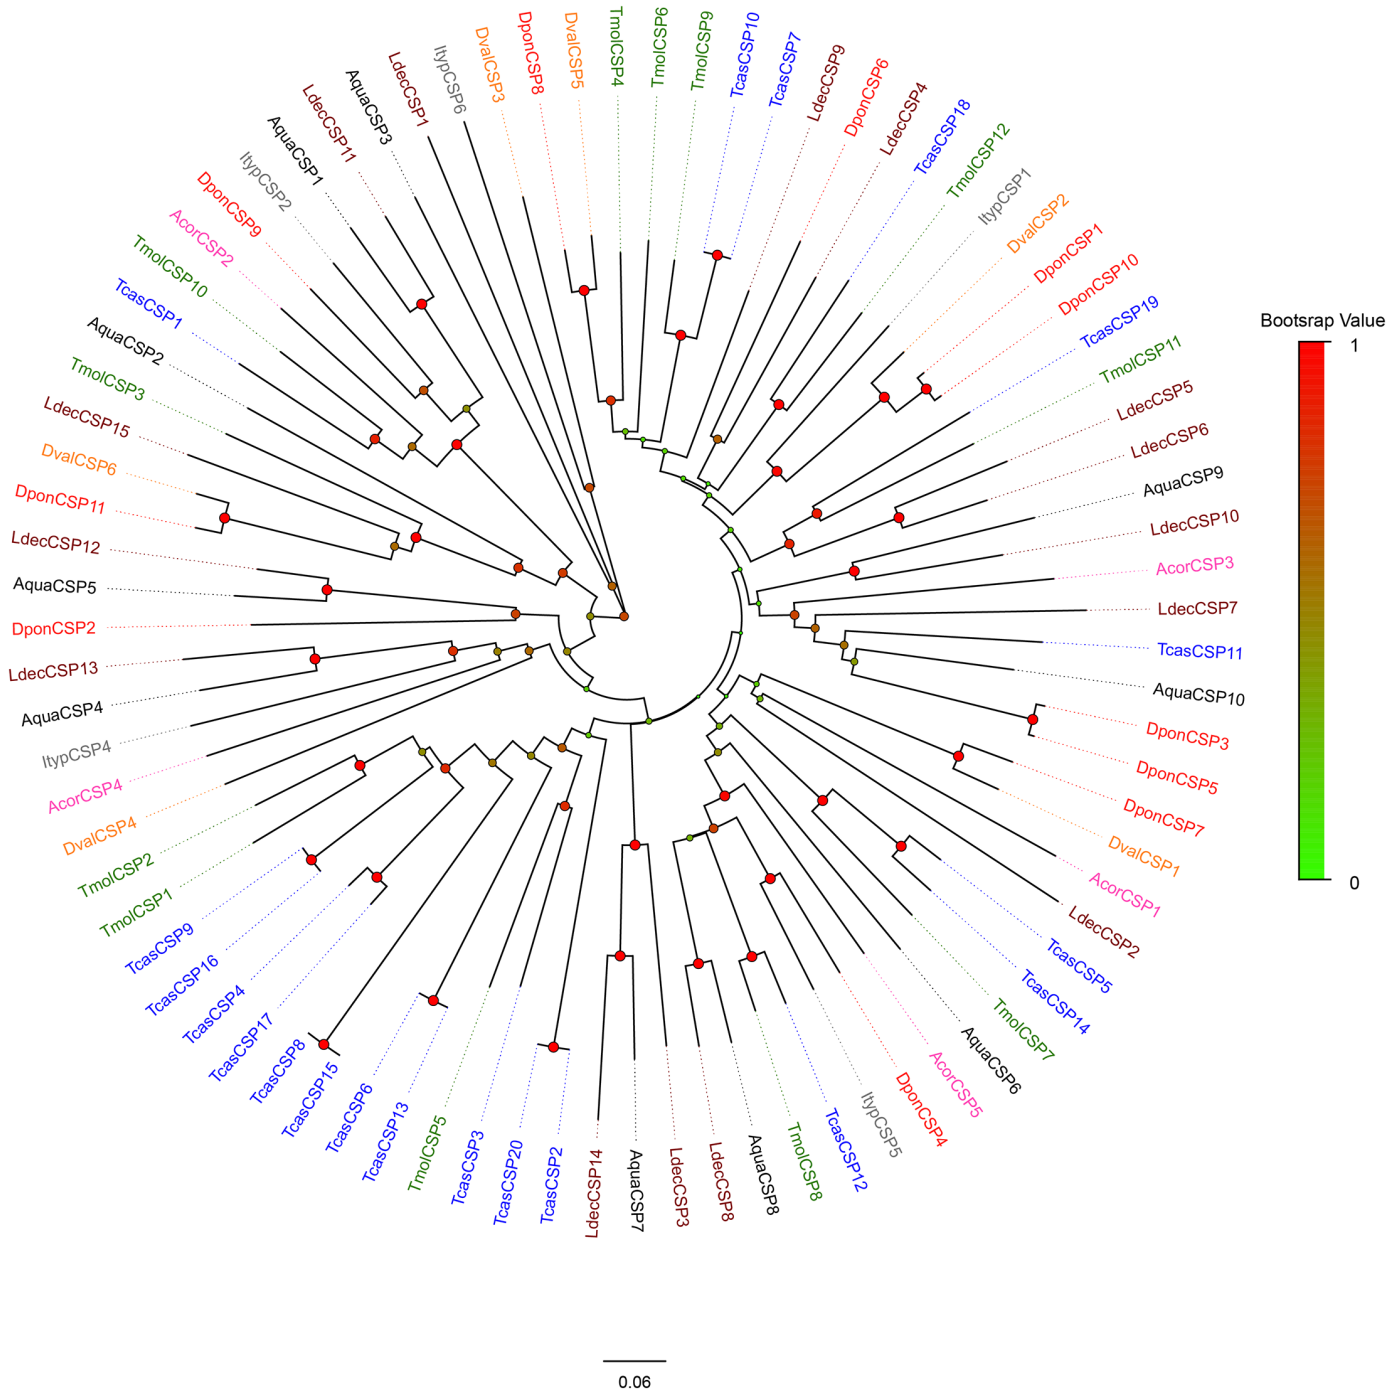

**Fig 5. Neighbor-joining tree of AquaCSPs.** Values indicated at the nodes are bootstrap values based on 1000 replicates; scale bar = 0.1. Aqua: *Ambrostoma quadriimpresum*; Tcas: *Tribolium castaneum*; Dpon: *Dendroctonus ponderosae*; Ityp: *Ips typographus*; Ldec: *Leptinotarsa decemlineata*; Tmol: *Tenebrio molitor*; Acor: *Anomala corpulenta*; Dval: *Dendroctonus valens*.

doi:10.1371/journal.pone.0147144.g005

RT-qPCR results were mostly consistent with the RT-PCR results, AquaOBP6/8/C2/C3/C4/C7, AquaCSP5/6/7/10, AquaOR6/23/24/31 and AquaIR4/5/11/14/16/64a showed highly non-olfactory expression, whereas AquaOBP1/2/3/4/7/C1/C5/C6, AquaCSP1/3/4/8/9 and AquaOR8/9/10/14/15/17/18/20/22/26/29/32/33 showed highly olfactory-specific expression. A

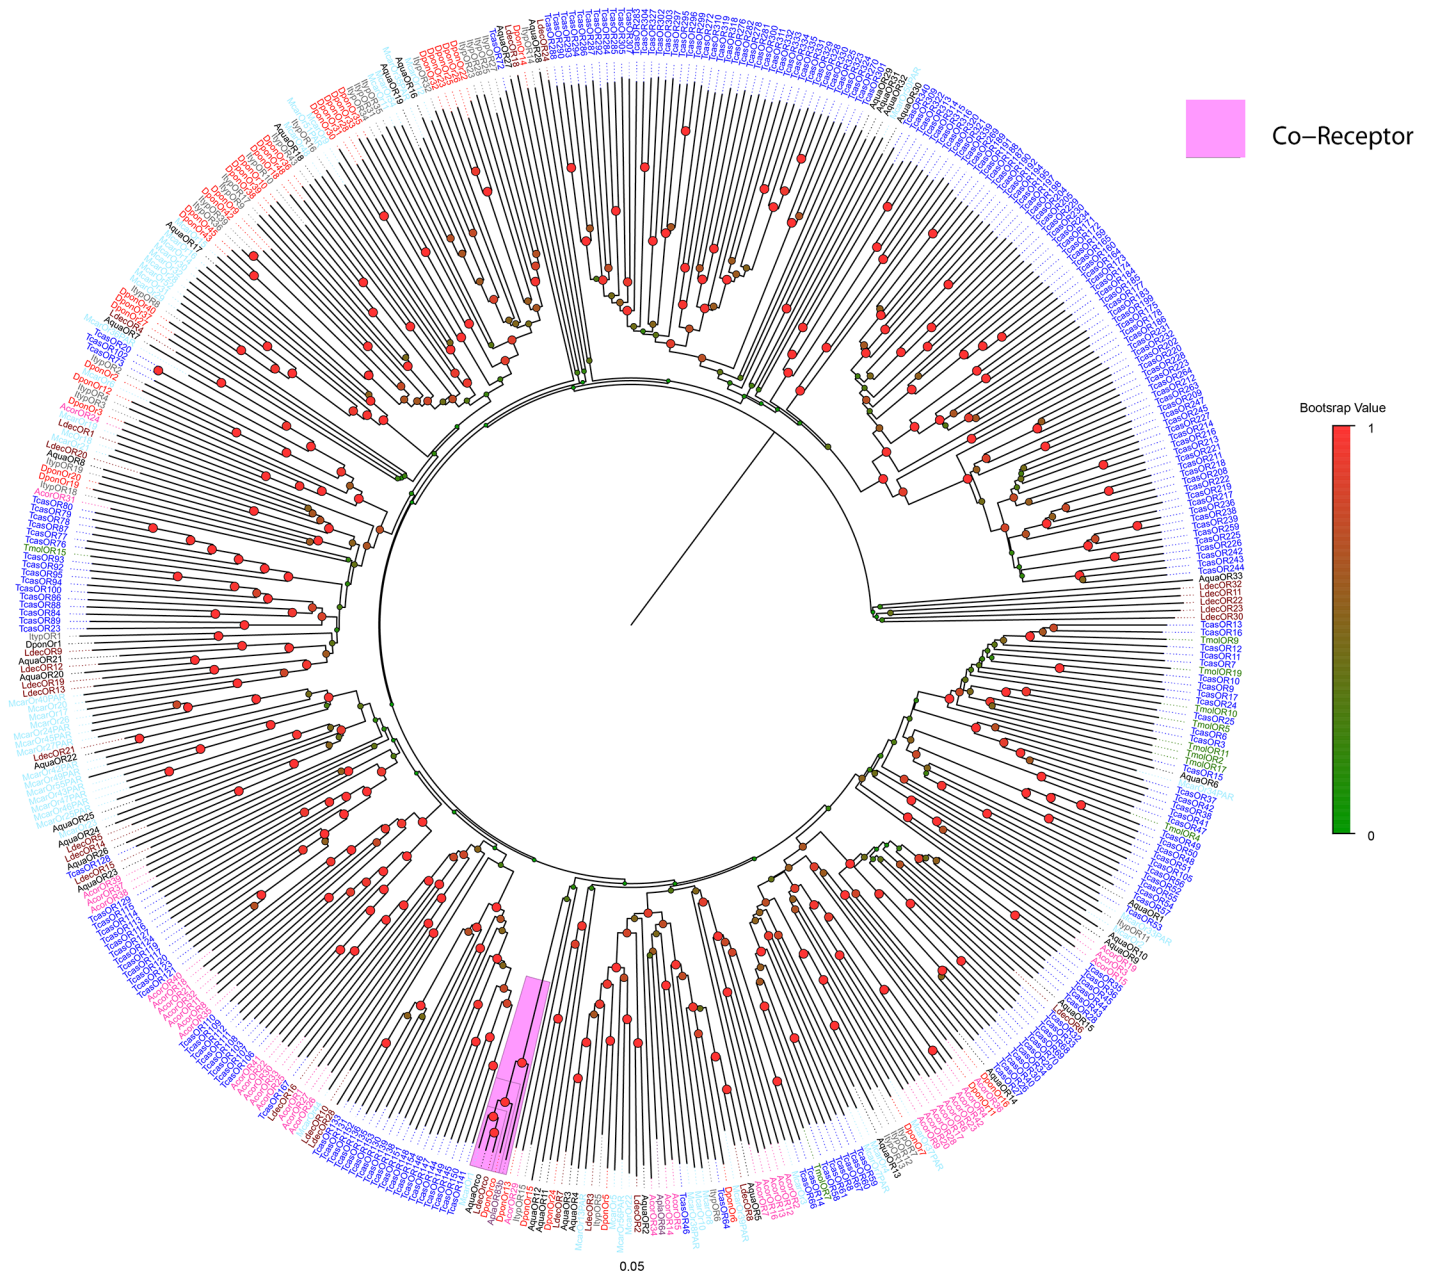

**Fig 6. Neighbor-joining tree of AquaORs.** Values indicated at the nodes are bootstrap values based on 1000 replicates; scale bar = 0.1. Aqua: *Ambrostoma quadriimpressum*; Tcas: *Tribolium castaneum*; Dpon: *Dendroctonus ponderosae*; Malt: *Monochamus alternatus*; Ldec: *Leptinotarsa decemlineata*; ltyp: *Ips typographus*; Mcar: *Megacyllene caryae*; Tmol: *Tenebrio molitor*; Acor: *Anomala corpulenta*. Dval: *Dendroctonus valens*; Agla: *Anoplophora glabripennis*. Purple indicates the Orco family.

doi:10.1371/journal.pone.0147144.g006

highly male-specific expression trend was observed for all of the candidate olfactory genes. Co-receptors AquaIR8a and AquaIR25a showed high expression levels in both males and females (Fig 10).

Finally, combined with the results of three different experiments, the decision of which genes are olfactory or non-olfactory expressed was made only when the results of all three experiments were consistent with each other. As a result, AquaOBP1/2/4/7/C1/C6, AquaCSP3/

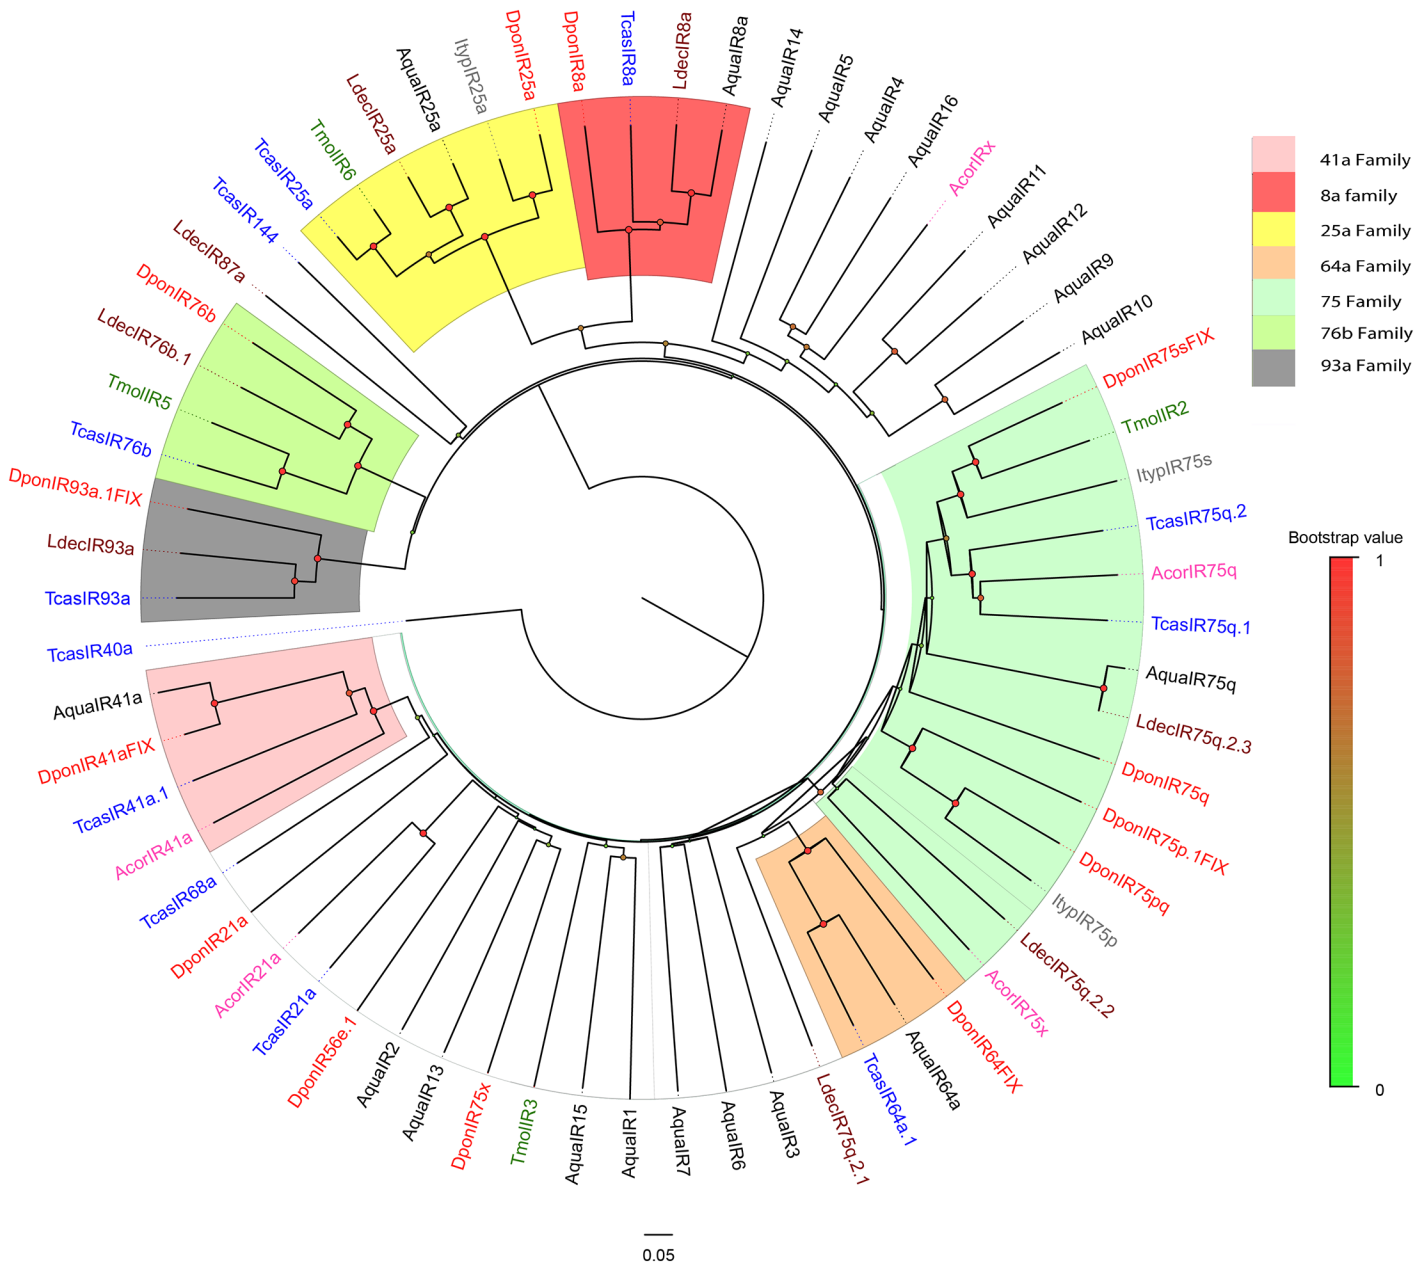

**Fig 7. Neighbor-joining tree of AqualRs.** Values indicated at the nodes are bootstrap values based on 1000 replicates, scale bar = 0.1, Aqua: *Ambrostoma quadriimpressum*; Tcas: *Tribolium castaneum*; Dpon: *Dendroctonus ponderosae*; Malt: *Monoctonus alternatus*; Ldec: *Leptinotarsa decemlineata*; Ityp: *Ips typographus*; Mcar: *Megacyllene caryae*; Tmol: *Tenebrio molitor*; Acor: *Anomala corpulenta*. Different color ranges indicate different IR families in reference to IR genes of *Drosophila melanogaster*.

doi:10.1371/journal.pone.0147144.g007

9, AquaOR8/9/10/14/15/18/20/26/29/33 and AquaIR8a/13/25a showed olfactory-specific expression, whereas AquaOBP6/C2/C3/C4/C7, AquaCSP5/7/10, AquaOR31 and AquaIR4/5/11/16 showed non-olfactory-specific expression. The remaining genes either showed no obvious organ specific expression or the results of the three methods were in conflict (Fig 11). RT-qPCR results were consistent with the RT-PCR results, but conflicted with results of the FKPM analyses in 9 of the 50 genes including AquaOBP5/8, AquaCSP1/6, AquaOR6/23/24 and AquaIR14/64a. To determine the reason for the discrepancy, we double-checked the RT-qPCR

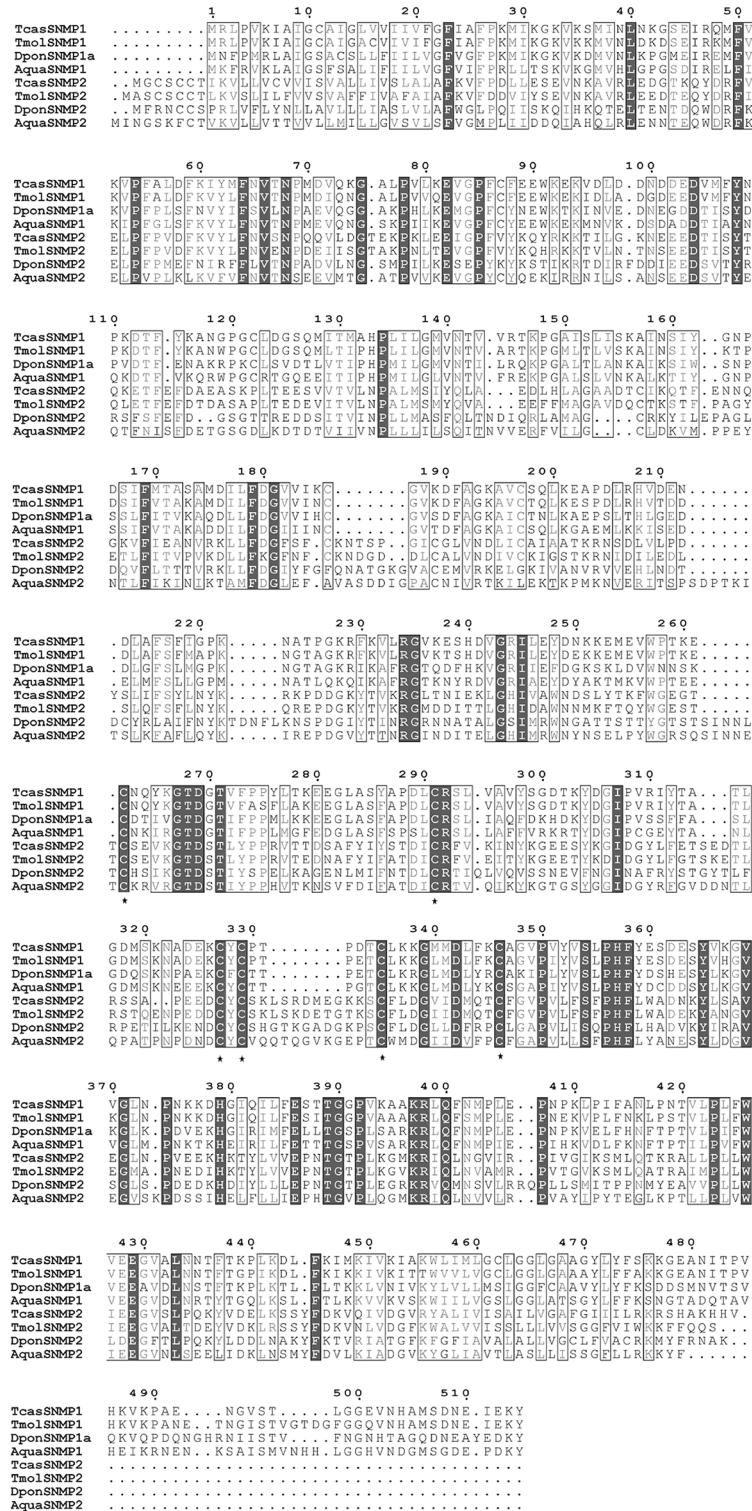

**Fig 8. Alignment of AquaSNMPs with other coleopteran species.** Aqua: *Ambrostoma quadriimpressum*; Tcas: *Tribolium castaneum*; Dpon: *Dendroctonus ponderosae*; Tmol: *Tenebrio molitor*. The dark background indicates highly conserved sites, other conserved sites are marked with boxes, \* indicates a conserved cysteine site.

doi:10.1371/journal.pone.0147144.g008

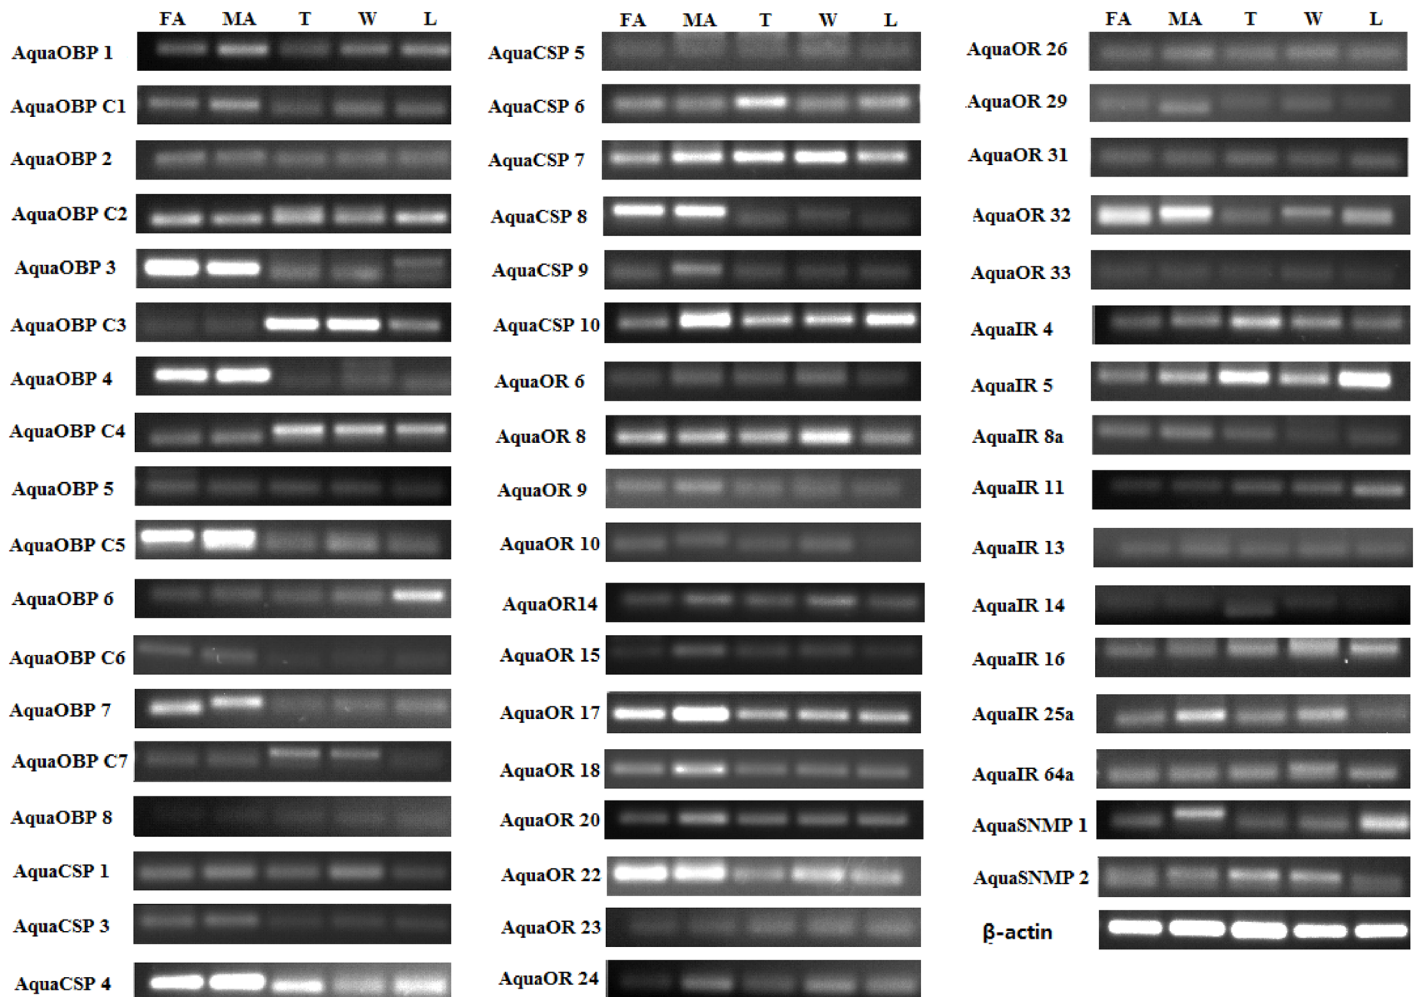

**Fig 9. RT-PCR results of candidate olfactory genes of *A. quadriimpressum*.** FA: female antenna; MA: male antenna; FL: female leg; ML: male leg; T: Thorax; W: hind wing.  $\beta$ -actin was used as an internal control.

doi:10.1371/journal.pone.0147144.g009

and FKPM values. For AquaOBP8, AquaCSP6, AquaOR6/23/24, and AquaIR14/64a, the expression levels in thoracic muscle and hindwings were much higher than that in antennae. The calculated non-olfactory RT-PCR and RT-qPCR results were averaged across leg, thorax, and hindwings, whereas the RNA-Seq data were based on a single leg. This variation likely caused the observed mismatch.

## Discussion

Based on deep RNA sequencing of the antenna and legs, we identified 16 candidate OBPs, 10 candidate CSPs, 34 candidate ORs, 20 candidate IRs and 2 candidate SNMPs of *A. quadriimpressum*. To the best of our knowledge, the molecular underpinnings of the olfactory system of Coleoptera are relatively unknown, and only a few species' olfactory genes have been identified, such as those of bark beetles [11, 13, 17], long-horned beetles [14, 18, 19], scarab beetles [12, 15] and flour beetles [16]. This is the first comprehensive study of olfactory genes in the elm pest *A. quadriimpressum*. Most of the identified olfactory genes were found to be complete

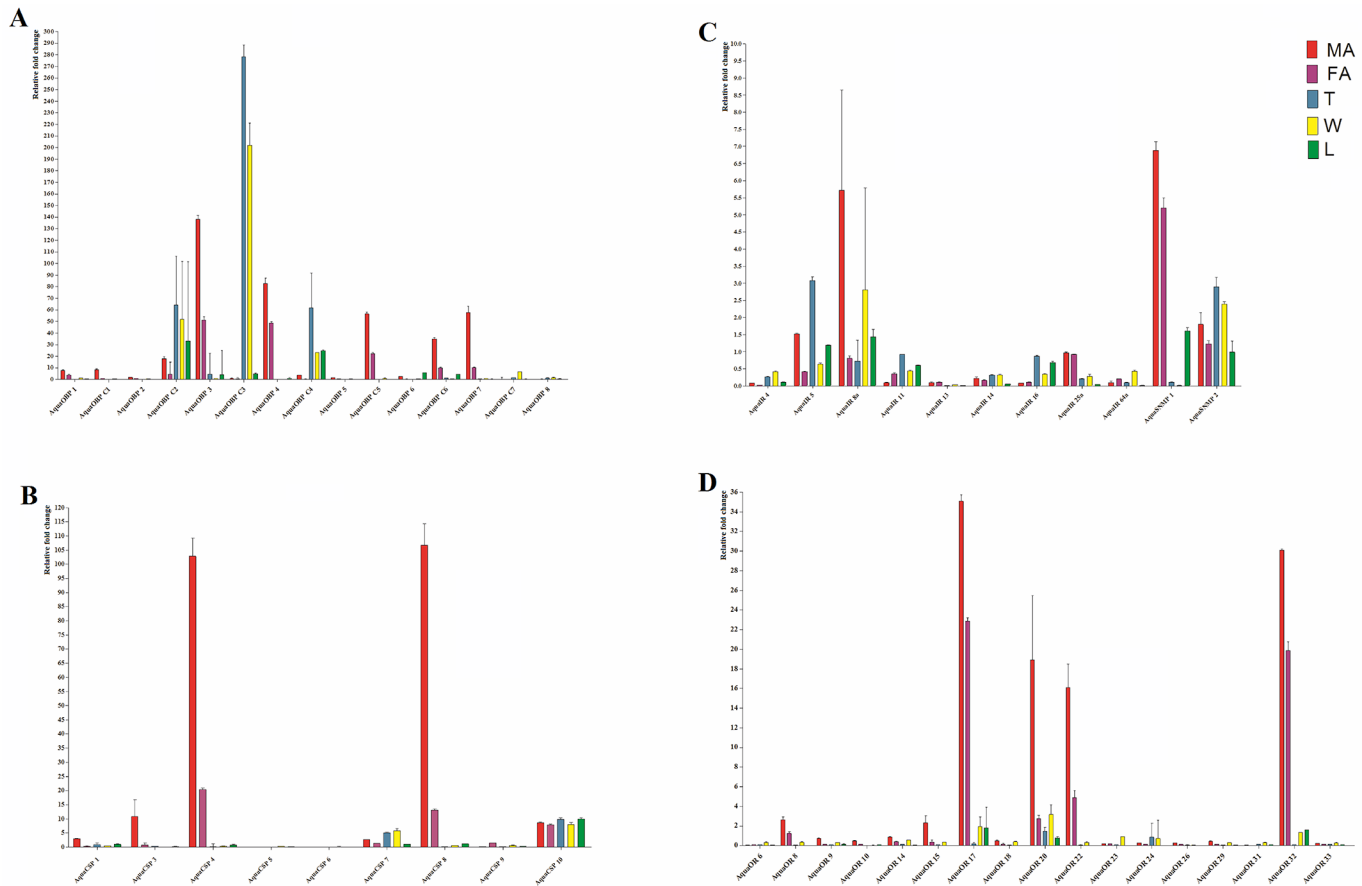

**Fig 10. RT-qPCR results of candidate olfactory genes of *A. quadriimpressum*.** RT-qPCR data analysis was performed using the  $2^{-\Delta\Delta CT}$  method. Error bars indicate the SEM. FA: female antenna; MA: male antenna; FL: female leg; ML: male leg; T: Thorax; W: hind wing.  $\beta$ -actin was used as an internal control.

doi:10.1371/journal.pone.0147144.g010

ORFs according to their lengths and structures; these data could contribute information about this process for future functional studies.

Annotation data showed that the number of genes in antenna with binding and receptor activities was greater than that of the legs. Many pathway genes were differentially expressed in the two organs, which strongly supported the olfactory-sensing role of the antenna at a transcriptional level. The calculated expression levels based on the FKPM method showed that a lot of the identified candidate olfactory genes were more or less antenna specific rather than non-olfactory organs. In previous research, the olfactory genes that were highly expressed in antenna but not non-olfactory organs were more likely to have a direct effect on the olfactory sensing process within a species [34]. Thus, most of the candidate olfactory genes identified were involved in the chemosensory process in *A. quadriimpressum*. A large number of olfactory genes were found to be specifically expressed in the antenna of *A. quadriimpressum*. Compared with other species, whose lives are highly reliant on olfaction, such as *Anopheles gambiae* and *Drosophila melanogaster*, the number of identified active olfactory genes in *A. quadriimpressum* was much lower (82 olfactory genes in *A. quadriimpressum*, 183 in *A. gambiae* and 302 in *D. melanogaster*, data from vectorbase and flybase, Dec. 2015). This is mainly because of the lack of genomic data for *A. quadriimpressum*. However, compared with other coleopteran species in which the genome data are not available (91 olfactory genes in *L. decemlineata*, 52 in

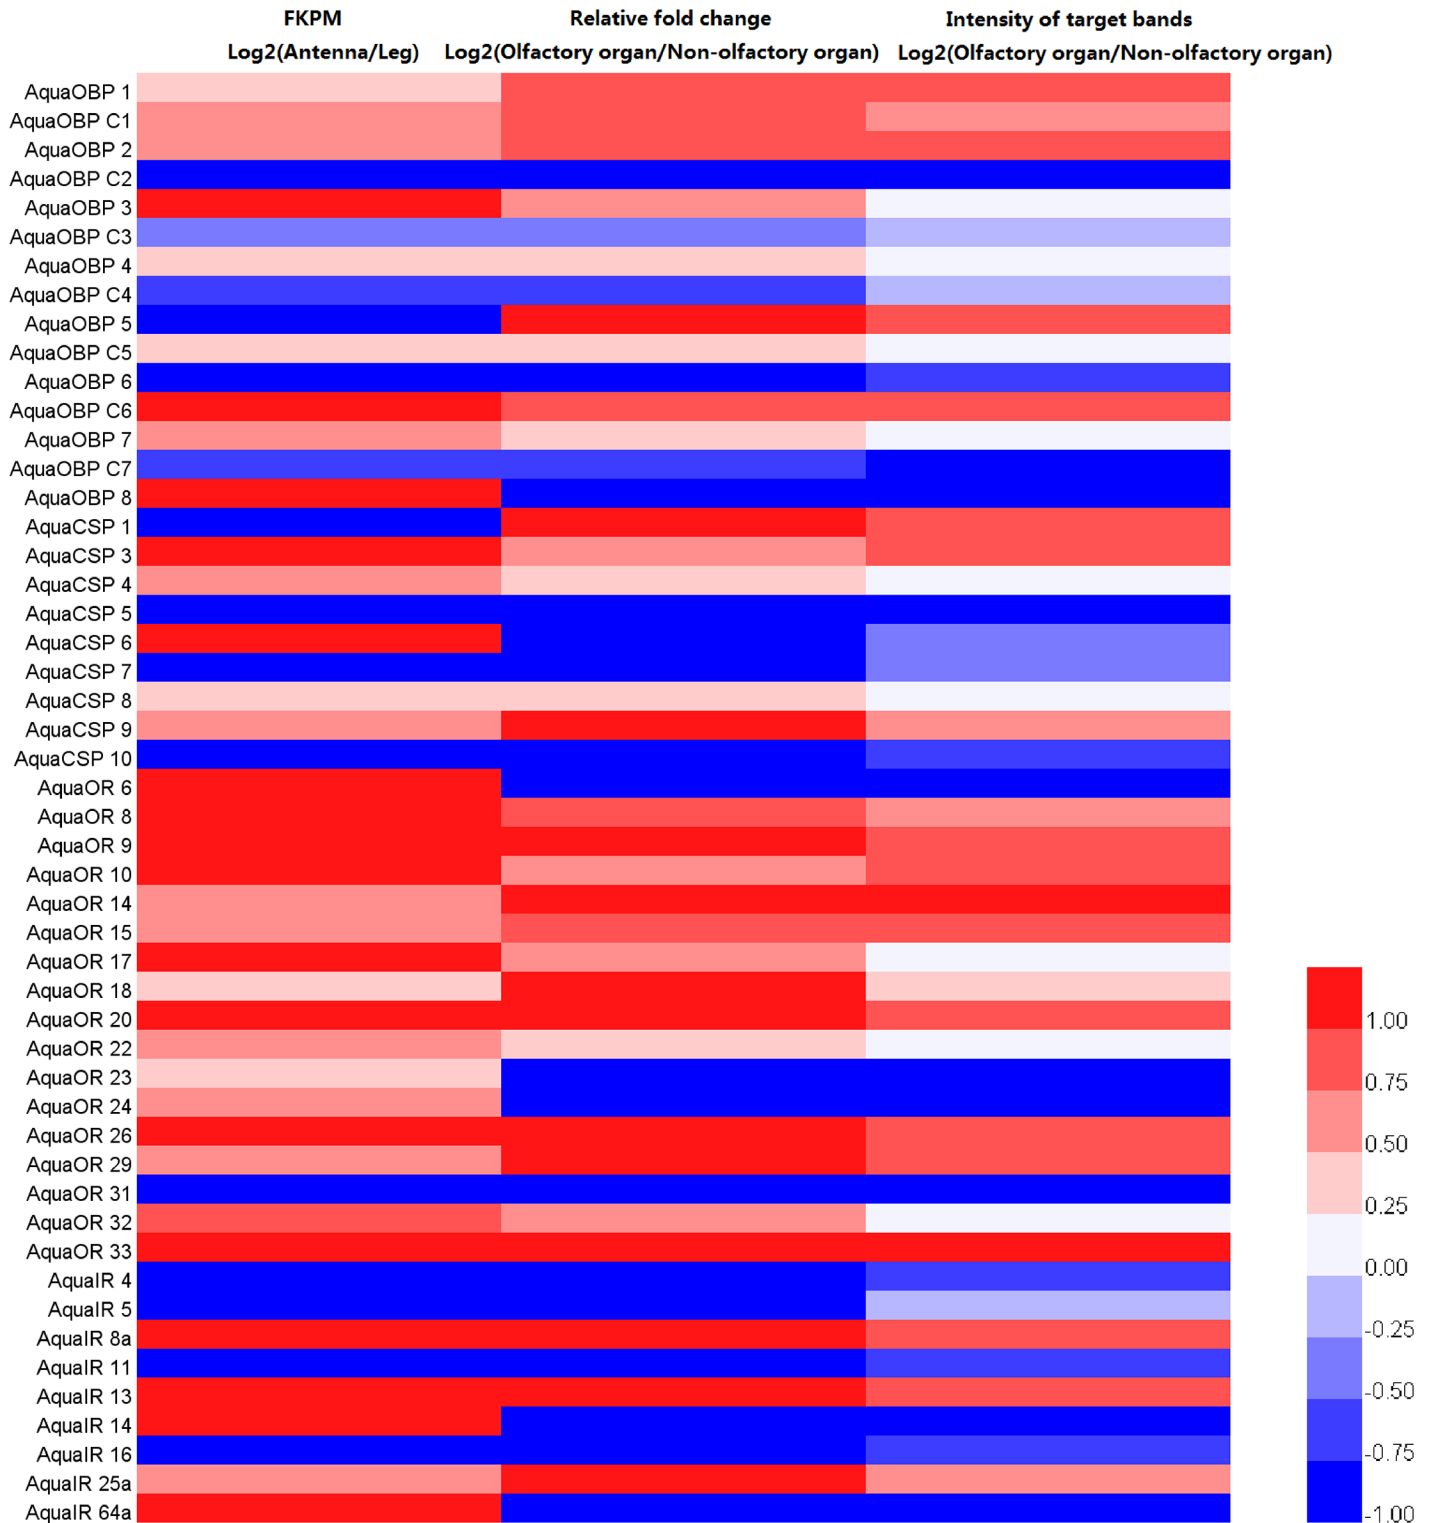

**Fig 11. Expression level heatmap of RNA-Seq, RT-PCR and RT-qPCR results.** Expression data were normalized to  $\pm 1$  by their range. Values  $> 0$ , indicate that the gene has olfactory specificity and is colored red, whereas values  $< 0$ , indicate that the gene has non-olfactory specificity and is colored blue. Light and dark colors indicate the ratio of expression level (Antenna/ Non-olfactory organs).

doi:10.1371/journal.pone.0147144.g011



*M. alternatus*, 64 in *A. corpulenta* and 58 in *T. molitor*, a relatively high number of candidate active genes were identified in *A. quadriimpressum* and *L. decemlineata*, suggesting that olfactory detection might play a key role in superfamily Chrysomeloidea.

Motif analysis showed that motif 6 in coleopteran OBPs had high similarity (E-value  $6.9e^{-4}$ ) with Andropin sequences in *Drosophila mauritiana*, and motif 7 showed similarity (E-value  $1.7e^{-1}$ ) with B-adaptin in *Arabidopsis thaliana*. These two proteins were previously identified as components in transmembrane signal transduction. [35, 36]. We still do not know if these two OBP motifs facilitate OR interactions. Future research into the functional role of the motifs should provide us a better understanding of how OBPs and ORs interact.

Combined with RT-PCR, RT-qPCR and homology analysis data, most candidate olfactory genes were shown to have male-specific expression patterns in *A. quadriimpressum*, suggesting that the olfactory system is highly developed in males and that olfactory detection plays a relatively important role in males. This result strongly supports the existence of a female-produced contact sex pheromone in *A. quadriimpressum* as previously shown on the molecular level [22], and additionally, a component of the female-produced sex pheromone and an aggregation pheromone have already been identified in other leaf beetles, such as *Leptinotarsa decemlineata* and *Phyllotreta cruciferae* [37, 38].

Notably, AquaOBP1/2/4/7/C1/C6, AquaCSP3/9, AquaOR8/9/10/14/15/18/20/26/29/33 and AquaIR8a/13/25a showed olfactory specific expression, suggesting that these candidate olfactory genes might play key roles in foraging and host-seeking in *A. quadriimpressum*. *A. quadriimpressum* is monophagous and a poor migrator that only feeds on the shoots and leaves of elms. Behavioral experiments demonstrated that *A. quadriimpressum* is attracted by elm volatiles and does not forage other plant leaves, even if starving to death [22, 23], indicating that *A. quadriimpressum* is highly reliant on olfaction. Functional characterization using of recombinantly expressed candidate CSPs/OBPs using volatiles from host and non-host plants is expected to lead to the development of more efficient, environmentally friendly control methods for *A. quadriimpressum*. Furthermore, AquaOR-AquaOrco expressing *Xenopus* oocytes can be established to aid in determining the narrow tuning of ORs to these chemicals. These results can provide valuable information on potential gene targets for genetic modification-based control strategies. A large number of similar studies were already performed and already put into use, especially in some well studied vector insects, such as mosquitos [39–41], but the precondition is the complete ORF sequences of these genes is available and accurate. Therefore, our results also provide necessary informations and narrowed the range of target genes to further functional expression studies.

AquaOBP4/C5, AquaCSP7/9/10, AquaOR15/17/20/24/32 and AquaIR4 were highly expressed in the antenna of males, suggesting that these genes are more likely related to sex-specific behaviors with a potential role as sex pheromone sensing protein/receptors. Many sex pheromones are already commercially used in monitoring and controlling pests, such as the use of sex pheromones in controlling some lepidopteran pests [42, 43]. The chemical constituents of *A. quadriimpressum* have not yet been finalized [22], therefore, further functional expression studies of these male sex-specific genes will help us to confirm the sex pheromone content of *A. quadriimpressum*, and then, aid in developing sex pheromone-based control methods. Homology analysis showed no orthologs were identified with PBP from other scarab beetles such as *Popillia japonica*, *Exomala orientalis*, *Anomala cuprea* and *Brachysternus prasinus*, among others [44–46], which strongly indicated that sex pheromone sensing genes in leaf beetles is different from that of scarab beetles. As expected, AquaIR8a and AquaIR25a showed high expression levels, suggesting a co-receptor role for these two genes.

Based on RNA sequencing, a large number of candidate olfactory genes were identified in *A. quadriimpressum*. The transcriptomes of the antenna (olfactory organ) and the leg (non-

olfactory organ) were compared. Moreover, RT-PCR, RT-qPCR and homology analysis were performed to confirm the tissue- and sex-specific expression patterns of these candidate chemosensory genes. Several potential functional olfactory genes were identified. Future studies aimed at exploring the *in vivo* functions of these genes and the subsequent development of environmentally friendly chemical control methods for *A. quadriimpressum* are the logical next steps.

## Supporting Information

### S1 Table. Nucleotide sequences of all identified candidate olfactory genes.

(DOC)

### S2 Table. Primer used in RT-PCRs and RT-qPCRs.

(DOC)

## Acknowledgments

We are extremely grateful to the members of our lab for the collection of materials. The materials used in this work were supported by the Jilin Provincial Key Laboratory of Animal Resource Conservation and Utilization, Key Laboratory of Vegetation Ecology, MOE, Northeast Normal University, Changchun, China.

## Author Contributions

Conceived and designed the experiments: YLW. Performed the experiments: YLW QC HBZ. Analyzed the data: QC. Contributed reagents/materials/analysis tools: HBZ. Wrote the paper: YLW BZR.

## References

1. Benton R, Vannice KS, Gomez-Diaz C, Vosshall LB. Variant ionotropic glutamate receptors as chemosensory receptors in *Drosophila*. *Cell*. 2009; 136(1):149–62. doi: [10.1016/j.cell.2008.12.001](https://doi.org/10.1016/j.cell.2008.12.001) PMID: [19135896](https://pubmed.ncbi.nlm.nih.gov/19135896/)
2. Todd J, Haynes K, Baker T. Antennal neurones specific for redundant pheromone components in normal and mutant *Trichoplusia ni* males. *Physiol Entomol*. 1992; 17(2):183–92.
3. Raguso RA. Floral scent, olfaction, and scent-driven foraging behavior. In: Chittka L, Thomson JD, editors. *Cognitive ecology of pollination*. Cambridge, UK: Cambridge University Press; 2001. p. 83–105.
4. Carey AF, Wang G, Su C-Y, Zwiebel LJ, Carlson JR. Odorant reception in the malaria mosquito *Anopheles gambiae*. *Nature*. 2010; 464(7285):66–71. doi: [10.1038/nature08834](https://doi.org/10.1038/nature08834) PMID: [20130575](https://pubmed.ncbi.nlm.nih.gov/20130575/)
5. Syed Z, Leal WS. Acute olfactory response of *Culex* mosquitoes to a human- and bird-derived attractant. *Proc Natl Acad Sci U S A*. 2009; 106(44):18803–8. Epub 2009/10/28. doi: [10.1073/pnas.0906932106](https://doi.org/10.1073/pnas.0906932106) PMID: [19858490](https://pubmed.ncbi.nlm.nih.gov/19858490/); PubMed Central PMCID: [PMC2767364](https://pubmed.ncbi.nlm.nih.gov/PMC2767364/).
6. Dahanukar A, Ray A. Courtship, aggression and avoidance: pheromones, receptors and neurons for social behaviors in *Drosophila*. *Fly*. 2011; 5(1):58–63. PMID: [20962580](https://pubmed.ncbi.nlm.nih.gov/20962580/)
7. Horst R, Damberger F, Luginbuhl P, Guntert P, Peng G, Nikonova L, et al. NMR structure reveals intramolecular regulation mechanism for pheromone binding and release. *Proc Natl Acad Sci U S A*. 2001; 98(25):14374–9. Epub 2001/11/29. doi: [10.1073/pnas.251532998](https://doi.org/10.1073/pnas.251532998) PMID: [11724947](https://pubmed.ncbi.nlm.nih.gov/11724947/); PubMed Central PMCID: [PMC64689](https://pubmed.ncbi.nlm.nih.gov/PMC64689/).
8. Larsson MC, Domingos AI, Jones WD, Chiappe ME, Amrein H, Vosshall LB. Or83b encodes a broadly expressed odorant receptor essential for *Drosophila* olfaction. *Neuron*. 2004; 43(5):703–14. PMID: [15339651](https://pubmed.ncbi.nlm.nih.gov/15339651/)
9. Leal WS. Odorant reception in insects: roles of receptors, binding proteins, and degrading enzymes. *Annual review of entomology*. 2013; 58:373–91. doi: [10.1146/annurev-ento-120811-153635](https://doi.org/10.1146/annurev-ento-120811-153635) PMID: [23020622](https://pubmed.ncbi.nlm.nih.gov/23020622/)
10. Hallem EA, Carlson JR. Coding of odors by a receptor repertoire. *Cell*. 2006; 125(1):143–60. PMID: [16615896](https://pubmed.ncbi.nlm.nih.gov/16615896/)

11. Andersson MN, Grosse-Wilde E, Keeling CI, Bengtsson JM, Yuen MM, Li M, et al. Antennal transcriptome analysis of the chemosensory gene families in the tree killing bark beetles, *Ips typographus* and *Dendroctonus ponderosae* (Coleoptera: Curculionidae: Scolytinae). *BMC genomics*. 2013; 14(1):198.
12. Chen H, Lin L, Xie M, Zhang G, Su W. De novo sequencing, assembly and characterization of antennal transcriptome of *Anomala corpulenta* Motschulsky (Coleoptera: Rutelidae). *PloS one*. 2014; 9(12): e114238. doi: [10.1371/journal.pone.0114238](https://doi.org/10.1371/journal.pone.0114238) PMID: [25461610](https://pubmed.ncbi.nlm.nih.gov/25461610/)
13. Gu XC, Zhang YN, Kang K, Dong SL, Zhang LW. Antennal transcriptome analysis of odorant reception genes in the red turpentine beetle (RTB), *Dendroctonus valens*. *PLoS One*. 2015; 10(5):e0125159. Epub 2015/05/06. doi: [10.1371/journal.pone.0125159](https://doi.org/10.1371/journal.pone.0125159) PMID: [25938508](https://pubmed.ncbi.nlm.nih.gov/25938508/); PubMed Central PMCID: PMC4418697.
14. Li H, Zhang A, Chen L-Z, Zhang G, Wang M-Q. Construction and analysis of cDNA libraries from the antennae of *Batocera horsfieldi* and expression pattern of putative odorant binding proteins. *J Insect Sci*. 2014; 14(1):57.
15. Li X, Ju Q, Jie W, Li F, Jiang X, Hu J, et al. Chemosensory gene families in adult antennae of *Anomala corpulenta* Motschulsky (Coleoptera: Scarabaeidae: Rutelinae). *PLoS One*. 2015; 10(4):e0121504. Epub 2015/04/10. doi: [10.1371/journal.pone.0121504](https://doi.org/10.1371/journal.pone.0121504) PMID: [25856077](https://pubmed.ncbi.nlm.nih.gov/25856077/); PubMed Central PMCID: PMC4391716.
16. Liu S, Rao XJ, Li MY, Feng MF, He MZ, Li SG. Identification of candidate chemosensory genes in the antennal transcriptome of *Tenebrio molitor* (Coleoptera: Tenebrionidae). *Comp Biochem Physiol Part D Genomics Proteomics*. 2015; 13:44–51. Epub 2015/02/11. doi: [10.1016/j.cbd.2015.01.004](https://doi.org/10.1016/j.cbd.2015.01.004) PMID: [25665775](https://pubmed.ncbi.nlm.nih.gov/25665775/).
17. Diakite MM, Wang J, Ali S, Wang M-Q. Identification of chemosensory gene families in *Rhyzopertha dominica* (Coleoptera: Bostrichidae). *Can Entomol*. 2015.
18. Mitchell RF, Hughes DT, Luetje CW, Millar JG, Soriano-Agatón F, Hanks LM, et al. Sequencing and characterizing odorant receptors of the cerambycid beetle *Megacyllene caryae*. *Insect Biochem Mol Biol*. 2012; 42(7):499–505. doi: [10.1016/j.ibmb.2012.03.007](https://doi.org/10.1016/j.ibmb.2012.03.007) PMID: [22504490](https://pubmed.ncbi.nlm.nih.gov/22504490/)
19. Wang J, Li DZ, Min SF, Mi F, Zhou SS, Wang MQ. Analysis of chemosensory gene families in the beetle *Monochamus alternatus* and its parasitoid *Dastarcus helophoroides*. *Comp Biochem Physiol Part D Genomics Proteomics*. 2014; 11:1–8. Epub 2014/06/04. doi: [10.1016/j.cbd.2014.05.001](https://doi.org/10.1016/j.cbd.2014.05.001) PMID: [24893337](https://pubmed.ncbi.nlm.nih.gov/24893337/).
20. Liu Y, Sun L, Cao D, Walker WB III, Zhang Y, Wang G. Identification of candidate olfactory genes in *Leptinotarsa decemlineata* by antennal transcriptome analysis. *Frontiers in Ecology and Evolution*. 2015; 3:60.
21. Liu Y, Li WL, Liu SJ, Wu W, Zhang YW, Zhai DP, et al. Biological characteristics and control technology of *Ambrostoma quadriimpresum*. *Heilongjiang Agric Sci*. 2014; 4:167–8.
22. Hu J. Copulation behaviour and structure of antennal lobe of *Ambrostoma quadriimpresum* Motschulsky [PhD Thesis]. Northeast Forestry University 2012.
23. Cheng B. The mechanism of chemical communication between elm and *Ambrostoma quadriimpresum* [PhD Thesis]. Northeast Forestry University 2010.
24. Liang CJ, She L, Wang JW, Guo JW, Zhang AS, Tong JY, et al. *A. quadriimpresum* control test by using two kinds of esbiothrin. *Pesticides*. 1990; 29:52–3.
25. Edgar RC. MUSCLE: multiple sequence alignment with high accuracy and high throughput. *Nucleic Acids Res*. 2004; 32(5):1792–7. PMID: [15034147](https://pubmed.ncbi.nlm.nih.gov/15034147/)
26. Mortazavi A, Williams BA, McCue K, Schaeffer L, Wold B. Mapping and quantifying mammalian transcriptomes by RNA-Seq. *Nat Methods*. 2008; 5(7):621–8. Epub 2008/06/03. doi: [10.1038/nmeth.1226](https://doi.org/10.1038/nmeth.1226) PMID: [18516045](https://pubmed.ncbi.nlm.nih.gov/18516045/).
27. Bailey TL, Johnson J, Grant CE, Noble WS. The MEME Suite. *Nucleic Acids Res*. 2015; 43(W1):W39–49. Epub 2015/05/09. doi: [10.1093/nar/gkv416](https://doi.org/10.1093/nar/gkv416) PMID: [25953851](https://pubmed.ncbi.nlm.nih.gov/25953851/); PubMed Central PMCID: PMC4489269.
28. Tamura K, Stecher G, Peterson D, Filipiński A, Kumar S. MEGA6: Molecular Evolutionary Genetics Analysis version 6.0. *Mol Biol Evol*. 2013; 30(12):2725–9. Epub 2013/10/18. doi: [10.1093/molbev/mst197](https://doi.org/10.1093/molbev/mst197) PMID: [24132122](https://pubmed.ncbi.nlm.nih.gov/24132122/); PubMed Central PMCID: PMC3840312.
29. Glusman G, Bahar A, Sharon D, Pilpel Y, White J, Lancet D. The olfactory receptor gene superfamily: data mining, classification, and nomenclature. *Mamm Genome*. 2000; 11(11):1016–23. Epub 2000/11/04. PMID: [11063259](https://pubmed.ncbi.nlm.nih.gov/11063259/).
30. Deng W, Wang Y, Liu Z, Cheng H, Xue Y. HemI: a toolkit for illustrating heatmaps. *PLoS One*. 2014; 9(11):e111988. Epub 2014/11/06. doi: [10.1371/journal.pone.0111988](https://doi.org/10.1371/journal.pone.0111988) PMID: [25372567](https://pubmed.ncbi.nlm.nih.gov/25372567/); PubMed Central PMCID: PMC4221433.

31. Abuin L, Bargeton B, Ulbrich MH, Isacoff EY, Kellenberger S, Benton R. Functional architecture of olfactory ionotropic glutamate receptors. *Neuron*. 2011; 69(1):44–60. doi: [10.1016/j.neuron.2010.11.042](https://doi.org/10.1016/j.neuron.2010.11.042) PMID: [21220098](https://pubmed.ncbi.nlm.nih.gov/21220098/)
32. Ai M, Blais S, Park JY, Min S, Neubert TA, Suh GS. Ionotropic glutamate receptors IR64a and IR8a form a functional odorant receptor complex in vivo in *Drosophila*. *J Neurosci*. 2013; 33(26):10741–9. Epub 2013/06/28. doi: [10.1523/JNEUROSCI.5419-12.2013](https://doi.org/10.1523/JNEUROSCI.5419-12.2013) PMID: [23804096](https://pubmed.ncbi.nlm.nih.gov/23804096/); PubMed Central PMCID: [PMC3693055](https://pubmed.ncbi.nlm.nih.gov/PMC3693055/).
33. Koh T-W, He Z, Gorur-Shandilya S, Menuz K, Larter NK, Stewart S, et al. The *Drosophila* IR20a clade of ionotropic receptors are candidate taste and pheromone receptors. *Neuron*. 2014; 83(4):850–65. doi: [10.1016/j.neuron.2014.07.012](https://doi.org/10.1016/j.neuron.2014.07.012) PMID: [25123314](https://pubmed.ncbi.nlm.nih.gov/25123314/)
34. Leal WS, Choo Y-M, Xu P, da Silva CS, Ueira-Vieira C. Differential expression of olfactory genes in the southern house mosquito and insights into unique odorant receptor gene isoforms. *Proc Natl Acad Sci U S A*. 2013; 110(46):18704–9. doi: [10.1073/pnas.1316059110](https://doi.org/10.1073/pnas.1316059110) PMID: [24167245](https://pubmed.ncbi.nlm.nih.gov/24167245/)
35. Christensen B, Fink J, Merrifield R, Mauzerall D. Channel-forming properties of cecropins and related model compounds incorporated into planar lipid membranes. *Proceedings of the National Academy of Sciences*. 1988; 85(14):5072–6.
36. Lodish HF, Berk A, Zipursky SL, Matsudaira P, Baltimore D, Darnell J. *Molecular cell biology*: Citeseer; 2000.
37. Jermy T, Butt BA. Method for screening female sex pheromone extracts of the Colorado potato beetle. *Entomol Exp Appl*. 1991; 59(1):75–8.
38. Soroka JJ, Bartelt RJ, Zilkowski BW, Cosse AA. Responses of flea beetle *Phyllotreta cruciferae* to synthetic aggregation pheromone components and host plant volatiles in field trials. *J Chem Ecol*. 2005; 31(8):1829–43. Epub 2005/10/14. PMID: [16222810](https://pubmed.ncbi.nlm.nih.gov/16222810/).
39. Basu S, Aryan A, Overcash JM, Samuel GH, Anderson MA, Dahlem TJ, et al. Silencing of end-joining repair for efficient site-specific gene insertion after TALEN/CRISPR mutagenesis in *Aedes aegypti*. *Proceedings of the National Academy of Sciences*. 2015; 112(13):4038–43.
40. Carey AF, Carlson JR. Insect olfaction from model systems to disease control. *Proceedings of the National Academy of Sciences*. 2011; 108(32):12987–95.
41. Xu P, Choo Y-M, De La Rosa A, Leal WS. Mosquito odorant receptor for DEET and methyl jasmonate. *Proceedings of the National Academy of Sciences*. 2014; 111(46):16592–7.
42. Furlong MJ, Pell JK, Pek Choo O, Abdul Rahman S. Field and laboratory evaluation of a sex pheromone trap for the autodissemination of the fungal entomopathogen *Zoophthora radicans* (Entomophthorales) by the diamondback moth, *Plutella xylostella* (Lepidoptera: Yponomeutidae). *Bulletin of Entomological research*. 1995; 85(03):331–7.
43. Martin N, Moore K, Musto CJ, Linn CE Jr. Flight Tunnel Response of Male European Corn Borer Moths to Cross-Specific Mixtures of European and Asian Corn Borer Sex Pheromones: Evidence Supporting a Critical Stage in Evolution of a New Communication System. *Journal of chemical ecology*. 2015:1–4.
44. Wojtasek H, Hansson BS, Leal WS. Attracted or repelled?—A matter of two neurons, one pheromone binding protein, and a chiral center. *Biochem Biophys Res Commun*. 1998; 250(2):217–22. PMID: [9753610](https://pubmed.ncbi.nlm.nih.gov/9753610/)
45. Peng G, Leal WS. Identification and cloning of a pheromone-binding protein from the oriental beetle, *Exomala orientalis*. *J Chem Ecol*. 2001; 27(11):2183–92. PMID: [11817074](https://pubmed.ncbi.nlm.nih.gov/11817074/)
46. Nikonov AA, Peng G, Tsurupa G, Leal WS. Unisex pheromone detectors and pheromone-binding proteins in scarab beetles. *Chem Senses*. 2002; 27(6):495–504. Epub 2002/07/27. PMID: [12142325](https://pubmed.ncbi.nlm.nih.gov/12142325/).
